# Supplementary material for: The Consumption of Cholesterol-Enriched Diets Conditions the Development of a Subtype of HCC with High Aggressiveness and Poor Prognosis
Source: PubMed Central journal article supplement (PMC8038696; doi:10.3390/cancers13071721), 2021-04-06
Supplement: cancers-13-01721-s001.pdf [file cancers-13-01721-s001.pdf]

# The Consumption of Cholesterol-Enriched Diets Conditions the Development of a Subtype of HCC with High Aggressiveness and Poor Prognosis

Arturo Simoni-Nieves, Soraya Salas-Silva, Lisette Chávez-Rodríguez, Alejandro Escobedo-Calvario, Matthis Desoteux, Leticia Bucio, Verónica Souza, Roxana U. Miranda-Labra, Linda E. Muñoz-Espinosa, Cédric Coulouarn, María Concepción Gutiérrez-Ruiz, Jens U. Marquardt and Luis E. Gomez-Quiroz

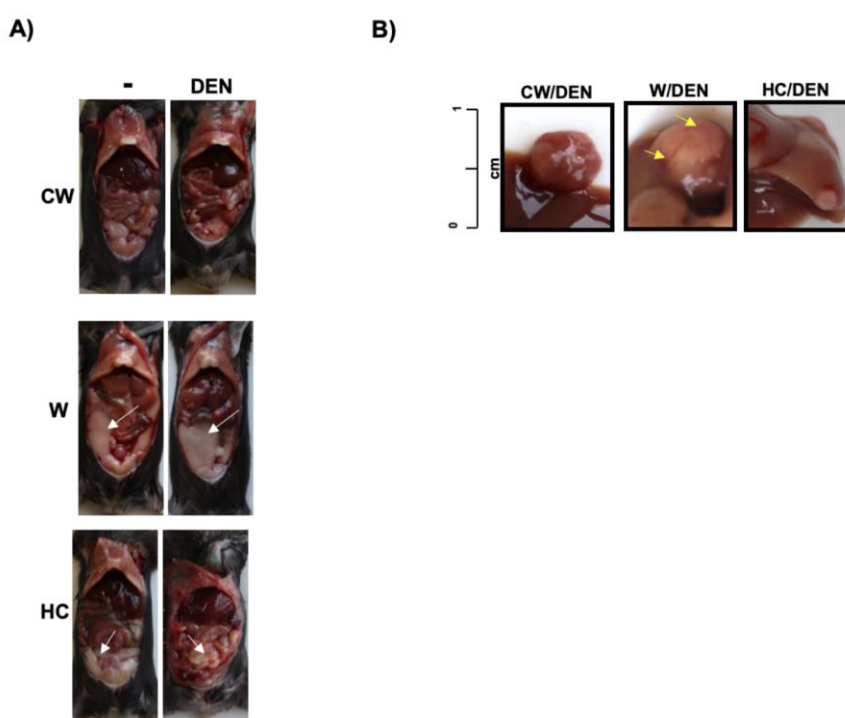

**Figure S1.** **A)** Gross inspection of mice fed with the different diets and treated or not with DEN. Representative image of at least eight animals, white arrows show adipose tissue. **B)** Tumor gross inspection of mice under different diets. Representative image of at least eight livers, yellow arrows show vascularity. Images are representative of at least eight mice.

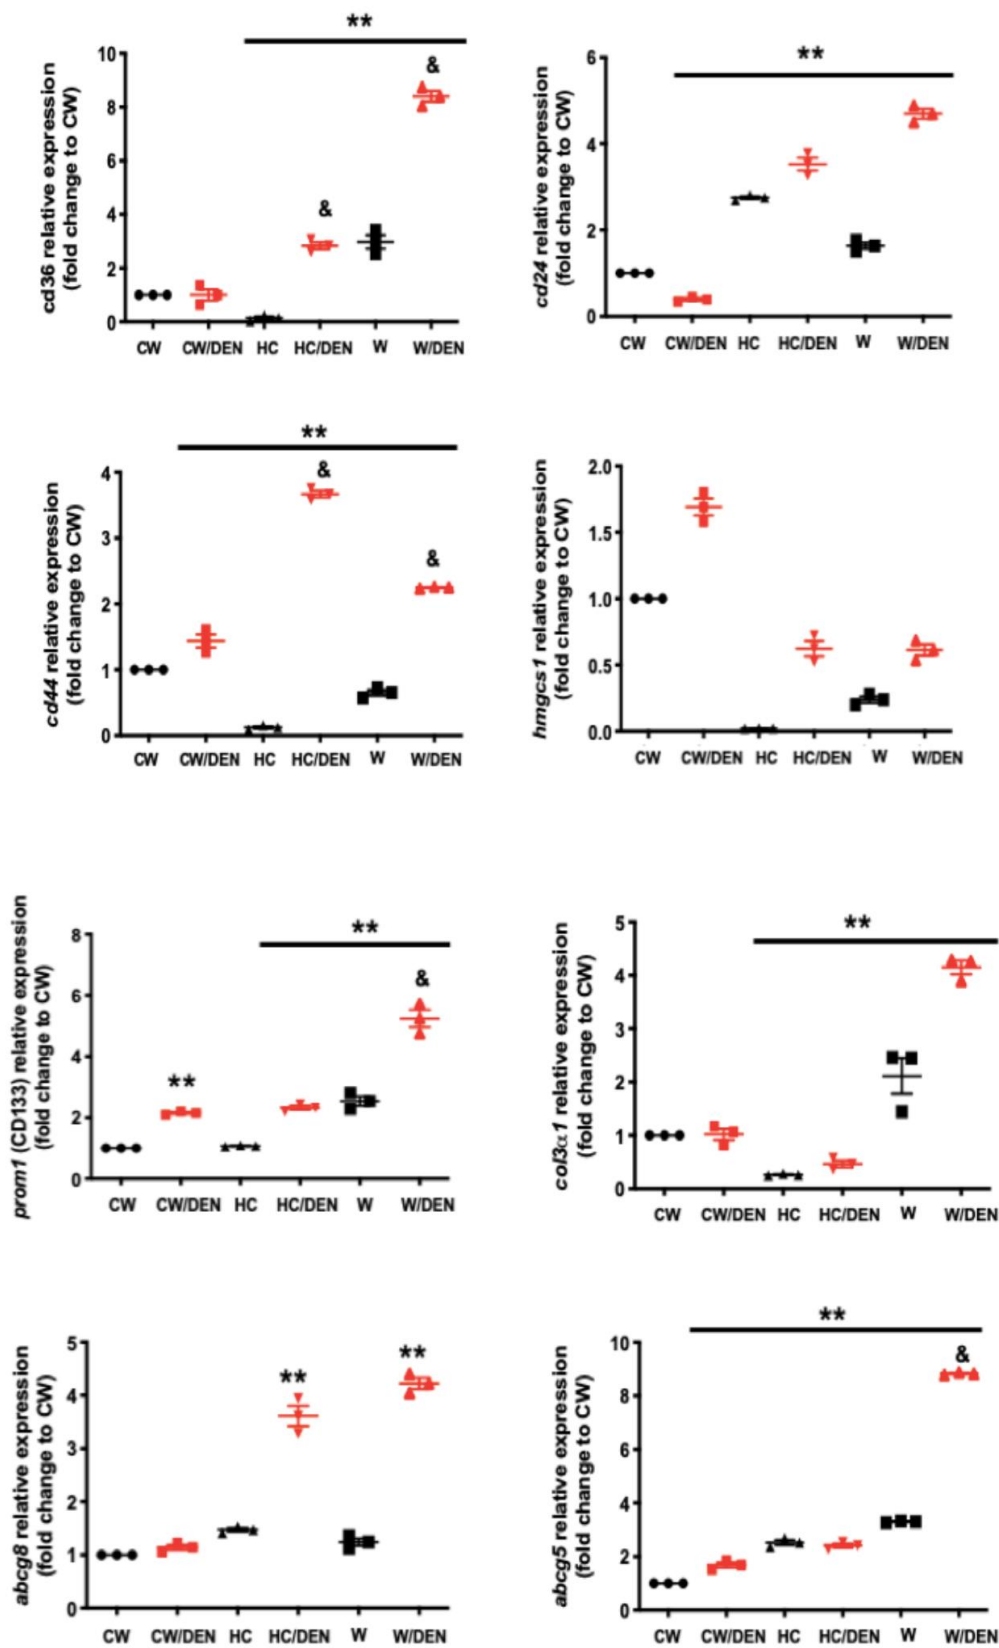

**Figure S2.** Expression of eight randomly selected genes in samples not included in the RNA-seq, as technical and biological validation. Each graph plots the individual data points, the superimpose horizontal line indicates the arithmetic mean and error bars showing  $\pm$  SEM. \*\*  $p < 0.01$  vs CW group; &  $p < 0.05$  vs diet control.

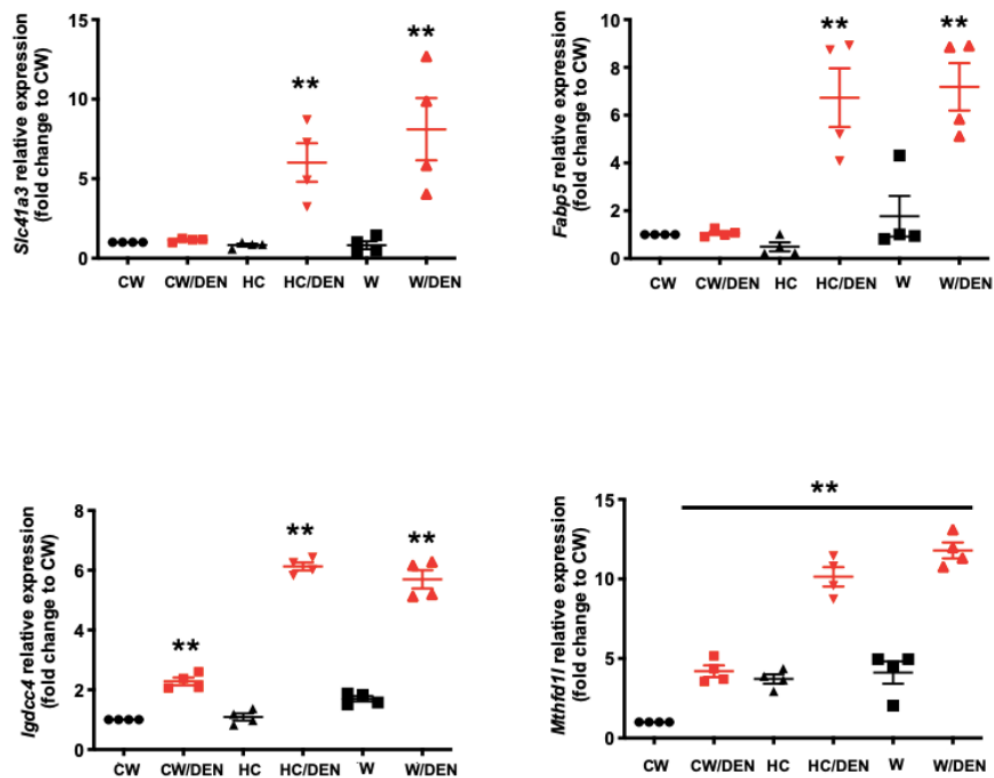

**Figure S3.** Expression of the 4 genes differentially overexpressed related to high lipid overload with potential relevance in tumor promotion: Mthfd1, Slc41a3, Fabp5, Igdcc4. Each graph plots the individual data points, the superimpose horizontal line indicates the arithmetic mean and error bars showing  $\pm$  SEM. \*\*  $p < 0.01$  vs CW group.

**Table S1.** Mice groups under different diets and treatments.

| Group Number | Diet                | DEN Single dose (10 ug/kg, ip) | Group ID | Number of Animals (n) |
|--------------|---------------------|--------------------------------|----------|-----------------------|
| 1            | Regular Chow        | -                              | CW       | 8                     |
| 2            | Regular Chow        | +                              | CW/DEN   | 8                     |
| 3            | Western             | -                              | W        | 8                     |
| 4            | Western             | +                              | W/DEN    | 8                     |
| 5            | High cholesterol 1% | -                              | HC       | 8                     |
| 6            | High cholesterol 1% | +                              | HC/DEN   | 8                     |

**Table S2.** Primers used in the study.

| Gene Name | Ensembl ID         | Primer Sequence                  |
|-----------|--------------------|----------------------------------|
| Cd24      | ENSMUSG00000047139 | 5'-GCTCCTACCCACGCAGATTT-3' (20)  |
|           |                    | 5'-TGGTGGTAGCGTTACTTGGGA-3' (20) |
| Prom1     | ENSMUSG00000029086 | 5'-GAAAAGTTGCTCTGCGAACC-3' (20)  |
|           |                    | 5'-TCTCAAGCTGAAAAGCAGCA-3' (20)  |
| Cd44      | ENSMUSG00000005087 | 5'-TGGATCCGAATTAGCTGGAC-3' (20)  |
|           |                    | 5'-AGCTTTTCTTCTGCCACA-3' (20)    |

|         |                                 |                                                                         |
|---------|---------------------------------|-------------------------------------------------------------------------|
| Col3a1  | ENSMUSG00000026043              | 5'-GTGTCAAAGGTGAACGTGGC-3' (20)<br>5'-ATCCCAGCAATCCCAAGTGG-3' (20)      |
| Slc41a3 | ENSMUST00000032177              | 5'-AACAGCCAGACCTTTGTGGTGC-3' (20)<br>5'-GATGCAGTGGTTGTCAGGATCC-3' (20)  |
| Fabp5   | ENSMUST00000029046              | 5'-GGTGCATTGGTTCAGCATCAGG-3' (20)<br>5'-TCATAGATCCGAGTACAGGTGAC-3' (20) |
| Igdcc4  | ENSMUST00000035499              | 5'-CGCACACCTGAATGTCAACTCC-3' (20)<br>5'-CGTGGATGTCTCCAGTCAAGTG-3' (20)  |
| Mthfd11 | ENSMUST00000043735              | 5'-GCCATGGATGCCTTAAGTTC-3' (20)<br>5'-AGCCAGGTAAACGAGTGAGC-3' (20)      |
| Cd36    | ENSMUST00000082367              | 5'-CCTTAAAGGAATCCCCGTGT-3' (20)<br>5'-TGCATTTGCCAATGTCTAGC-3' (20)      |
| Hmgcs1  | ENSMUST00000179869              | 5'-TTTGATGCAGCTGTTGAGG-3' (20)<br>5'-CCACCTGTAGGTCTGGCATT-3' (20)       |
| Abcg8   | ENSMUST00000045714              | 5'-CCTGATCCGTCGTCAGATTT-3' (20)<br>5'-CCATGGCCGTAGTAAAGGAA-3' (20)      |
| Abcg5   | ENSMUST00000066175              | 5'-CGTCCAGAACAACACGCTAA-3' (20)<br>5'-GCAGCATCTGCCACTTATGA-3' (20)      |
| Rps18   | <a href="#">ENST00000414228</a> | 5'-TGTGGTGTGAGGAAAGCAG-3' (20)<br>5'-TCCCATCCTTCACATCCTTC-3' (20)       |

Table S3. Antibodies used in the study.

| Antibody | Brand      | Catalog number | Dilution |
|----------|------------|----------------|----------|
| CD34     | Abcam      | ab81289        | 1:1000   |
| F4/80    | Abcam      | ab60343        | 1:1000   |
| CD206    | Santa Cruz | sc-376232      | 1:250    |

Table S4. Gene expression profile of W/DEN vs CW/DEN.

| Symbol        | log2FoldChange | pvalue    | padj      |
|---------------|----------------|-----------|-----------|
| Lcn2          | 6.144249476    | 3.45E-37  | 7.73E-35  |
| Klrb1b        | 6.02917133     | 1.11E-16  | 6.13E-15  |
| Cyp2a4        | 6.005827794    | 3.82E-63  | 2.57E-60  |
| Apoa4         | 5.998886702    | 2.12E-228 | 3.42E-224 |
| Gpc3          | 5.982100042    | 5.65E-14  | 2.34E-12  |
| Gldn          | 5.970045534    | 2.88E-16  | 1.51E-14  |
| Ly6d          | 5.92348089     | 1.03E-13  | 4.09E-12  |
| 5330417C22Rik | 5.584570455    | 6.93E-26  | 8.27E-24  |
| Akr1c18       | 5.429597703    | 5.65E-14  | 2.34E-12  |
| Mmp12         | 5.416961539    | 2.99E-14  | 1.28E-12  |
| Tspan8        | 5.323519633    | 7.47E-20  | 5.57E-18  |
| Kif5c         | 5.323052085    | 8.00E-11  | 2.28E-09  |
| Cacna1b       | 4.696180458    | 4.37E-11  | 1.29E-09  |
| Gm14936       | 4.627904898    | 3.66E-10  | 9.46E-09  |
| Cd63          | 4.576152649    | 1.61E-15  | 7.70E-14  |
| Adcy1         | 4.409834832    | 8.07E-23  | 7.60E-21  |

---

|                  |             |           |           |
|------------------|-------------|-----------|-----------|
| <b>Serpina12</b> | 4.360637563 | 1.47E-93  | 3.96E-90  |
| <b>Il1rn</b>     | 4.355639448 | 2.92E-10  | 7.70E-09  |
| <b>Mep1b</b>     | 4.27501959  | 1.33E-07  | 2.21E-06  |
| <b>GpnmB</b>     | 4.237963381 | 1.38E-13  | 5.39E-12  |
| <b>Cdh17</b>     | 4.185554666 | 4.76E-09  | 1.01E-07  |
| <b>Ifi2712b</b>  | 4.159263621 | 3.34E-22  | 3.01E-20  |
| <b>Rgs16</b>     | 4.156732381 | 1.62E-26  | 2.06E-24  |
| <b>Aebp1</b>     | 4.152364362 | 2.22E-15  | 1.05E-13  |
| <b>Fgf21</b>     | 4.144283377 | 2.44E-10  | 6.51E-09  |
| <b>Cyp2b13</b>   | 4.056988206 | 1.05E-08  | 2.13E-07  |
| <b>Psat1</b>     | 4.051031065 | 3.79E-07  | 5.79E-06  |
| <b>Gria3</b>     | 4.015795605 | 9.03E-13  | 3.25E-11  |
| <b>Pnpla5</b>    | 3.990753527 | 7.98E-09  | 1.65E-07  |
| <b>Tlr1</b>      | 3.981567094 | 3.44E-13  | 1.30E-11  |
| <b>Vmn2r3</b>    | 3.903778609 | 8.36E-08  | 1.46E-06  |
| <b>Galnt6</b>    | 3.87819635  | 1.33E-12  | 4.71E-11  |
| <b>Sgsm1</b>     | 3.874246865 | 4.89E-10  | 1.24E-08  |
| <b>Mmp13</b>     | 3.872872042 | 1.56E-08  | 3.09E-07  |
| <b>Nrg1</b>      | 3.860096689 | 3.95E-08  | 7.28E-07  |
| <b>Nid1</b>      | 3.846041182 | 1.50E-164 | 8.04E-161 |
| <b>Afp</b>       | 3.822330051 | 3.09E-24  | 3.28E-22  |
| <b>Ocstamp</b>   | 3.800300586 | 1.89E-14  | 8.19E-13  |
| <b>Shc2</b>      | 3.796698238 | 9.08E-09  | 1.85E-07  |
| <b>Fam83a</b>    | 3.751915473 | 1.96E-07  | 3.17E-06  |
| <b>Fst</b>       | 3.736884935 | 5.20E-11  | 1.52E-09  |
| <b>Tmem54</b>    | 3.607996424 | 4.29E-07  | 6.47E-06  |
| <b>Esm1</b>      | 3.603017942 | 3.58E-09  | 7.82E-08  |
| <b>Fstl4</b>     | 3.523169199 | 3.33E-06  | 4.23E-05  |
| <b>Spink1</b>    | 3.521534323 | 9.87E-07  | 1.40E-05  |
| <b>Lpar2</b>     | 3.515135681 | 9.05E-08  | 1.56E-06  |
| <b>Slc24a3</b>   | 3.466003116 | 5.85E-06  | 7.07E-05  |
| <b>Crybg2</b>    | 3.459202163 | 2.28E-10  | 6.11E-09  |
| <b>Itih5</b>     | 3.456801018 | 7.12E-37  | 1.57E-34  |
| <b>Ccdc120</b>   | 3.436843765 | 2.05E-06  | 2.73E-05  |
| <b>Itgax</b>     | 3.428892088 | 3.91E-10  | 1.01E-08  |
| <b>Ptpre</b>     | 3.415252249 | 3.39E-15  | 1.58E-13  |

---

---

|                  |             |          |            |
|------------------|-------------|----------|------------|
| <b>B4gal6</b>    | 3.413139284 | 2.21E-17 | 1.32E-15   |
| <b>Dab1</b>      | 3.411976156 | 1.84E-06 | 2.48E-05   |
| <b>Dusp5</b>     | 3.403156029 | 4.26E-07 | 6.43E-06   |
| <b>Lpl</b>       | 3.379294591 | 5.62E-39 | 1.37E-36   |
| <b>Rad51b</b>    | 3.350889497 | 8.07E-08 | 1.41E-06   |
| <b>Stap1</b>     | 3.333851029 | 1.47E-07 | 2.44E-06   |
| <b>Clec7a</b>    | 3.322445914 | 1.36E-14 | 5.94E-13   |
| <b>Mtmr11</b>    | 3.320308971 | 3.46E-12 | 1.18E-10   |
| <b>Kazald1</b>   | 3.319635151 | 8.19E-06 | 9.57E-05   |
| <b>Spp1</b>      | 3.30271085  | 1.85E-76 | 2.30E-73   |
| <b>Golm1</b>     | 3.29253552  | 7.04E-18 | 4.47E-16   |
| <b>Igfbp1</b>    | 3.281109685 | 7.00E-17 | 3.94E-15   |
| <b>Cacna1c</b>   | 3.133815428 | 6.05E-09 | 1.26E-07   |
| <b>Neurl1a</b>   | 3.115707478 | 1.97E-06 | 2.64E-05   |
| <b>Abcd2</b>     | 3.113308463 | 4.28E-44 | 1.28E-41   |
| <b>Tff3</b>      | 3.111638191 | 6.74E-07 | 9.80E-06   |
| <b>Ntrk2</b>     | 3.096815611 | 1.22E-06 | 1.71E-05   |
| <b>Gm13387</b>   | 3.093223938 | 1.17E-08 | 2.36E-07   |
| <b>Trem2</b>     | 3.084582288 | 7.70E-07 | 1.11E-05   |
| <b>Mpped1</b>    | 3.084508324 | 1.11E-05 | 0.00012532 |
| <b>Tmem86a</b>   | 3.083149209 | 3.94E-19 | 2.81E-17   |
| <b>Rasal1</b>    | 3.078432784 | 4.43E-05 | 0.00043346 |
| <b>Tlr13</b>     | 3.037861586 | 4.65E-07 | 6.94E-06   |
| <b>Ipcef1</b>    | 3.002340096 | 9.61E-08 | 1.65E-06   |
| <b>Igsf23</b>    | 2.993160174 | 2.67E-05 | 0.00027774 |
| <b>Phgdh</b>     | 2.967018996 | 3.65E-07 | 5.59E-06   |
| <b>Zfp57</b>     | 2.95800455  | 7.73E-08 | 1.36E-06   |
| <b>Saa1</b>      | 2.939575243 | 5.82E-15 | 2.67E-13   |
| <b>Rims2</b>     | 2.934984852 | 3.41E-09 | 7.46E-08   |
| <b>Tnfrsf12a</b> | 2.929747583 | 1.38E-14 | 6.02E-13   |
| <b>Cd14</b>      | 2.913639412 | 1.29E-07 | 2.17E-06   |
| <b>Scd2</b>      | 2.898182419 | 1.54E-12 | 5.41E-11   |
| <b>Mpeg1</b>     | 2.880338559 | 6.43E-50 | 2.53E-47   |
| <b>F2rl1</b>     | 2.874831327 | 8.03E-05 | 0.00074066 |
| <b>Aspm</b>      | 2.864264918 | 8.47E-08 | 1.47E-06   |
| <b>Itga2</b>     | 2.856246294 | 1.50E-07 | 2.48E-06   |

---

---

|                 |             |            |            |
|-----------------|-------------|------------|------------|
| <b>Ddr1</b>     | 2.851998527 | 7.26E-08   | 1.28E-06   |
| <b>Osbp13</b>   | 2.843868969 | 4.45E-47   | 1.49E-44   |
| <b>Lyve1</b>    | 2.835994713 | 9.52E-18   | 5.99E-16   |
| <b>Cntnap1</b>  | 2.795180228 | 9.03E-16   | 4.45E-14   |
| <b>Ptges</b>    | 2.779583209 | 7.48E-05   | 0.0006955  |
| <b>Col1a1</b>   | 2.757587669 | 5.89E-30   | 9.49E-28   |
| <b>Cdhr2</b>    | 2.748217767 | 6.50E-05   | 0.00061257 |
| <b>Ccl6</b>     | 2.744812808 | 1.28E-08   | 2.58E-07   |
| <b>Serpine1</b> | 2.741809992 | 8.27E-06   | 9.64E-05   |
| <b>Mthfd11</b>  | 2.740371517 | 3.95E-06   | 4.95E-05   |
| <b>Cers6</b>    | 2.736767355 | 8.29E-47   | 2.73E-44   |
| <b>H19</b>      | 2.736502713 | 0.00067516 | 0.00475947 |
| <b>Plch1</b>    | 2.731543411 | 5.29E-05   | 0.00051154 |
| <b>Cenpf</b>    | 2.726498734 | 1.56E-08   | 3.09E-07   |
| <b>Fhl3</b>     | 2.725248034 | 0.00019505 | 0.00162339 |
| <b>Ephb2</b>    | 2.719101785 | 3.47E-05   | 0.00034986 |
| <b>Abhd2</b>    | 2.718082453 | 7.11E-217  | 5.73E-213  |
| <b>Scn8a</b>    | 2.714650239 | 2.42E-11   | 7.46E-10   |
| <b>Cxcl9</b>    | 2.710852908 | 6.14E-11   | 1.77E-09   |
| <b>Col4a3</b>   | 2.707018975 | 2.54E-13   | 9.72E-12   |
| <b>Stambp11</b> | 2.705549328 | 3.43E-06   | 4.35E-05   |
| <b>Smpd3</b>    | 2.699862618 | 7.93E-10   | 1.94E-08   |
| <b>Cyp2b9</b>   | 2.697233386 | 4.59E-07   | 6.86E-06   |
| <b>Tnfsf13</b>  | 2.684083382 | 1.63E-05   | 0.00017735 |
| <b>Inhbb</b>    | 2.680214602 | 2.54E-06   | 3.32E-05   |
| <b>Tmem229a</b> | 2.674392393 | 3.60E-09   | 7.85E-08   |
| <b>Anxa2</b>    | 2.673682501 | 1.99E-25   | 2.31E-23   |
| <b>Tnfrsf21</b> | 2.669529818 | 5.29E-17   | 3.02E-15   |
| <b>Myo5c</b>    | 2.667275002 | 4.16E-06   | 5.17E-05   |
| <b>Slc41a3</b>  | 2.666553276 | 1.10E-07   | 1.86E-06   |
| <b>Btg2</b>     | 2.666094379 | 1.08E-26   | 1.40E-24   |
| <b>Saa2</b>     | 2.664266191 | 2.12E-10   | 5.74E-09   |
| <b>Elovl7</b>   | 2.662217301 | 5.90E-05   | 0.00056212 |
| <b>Gdpd1</b>    | 2.659216565 | 7.45E-05   | 0.00069365 |
| <b>Thbs1</b>    | 2.649147404 | 8.31E-13   | 3.03E-11   |
| <b>Saa3</b>     | 2.643228075 | 1.16E-12   | 4.13E-11   |

---

---

|                |             |            |            |
|----------------|-------------|------------|------------|
| <b>Drc1</b>    | 2.614207271 | 0.00028636 | 0.00228438 |
| <b>Ccr2</b>    | 2.597060547 | 2.62E-07   | 4.14E-06   |
| <b>Adgrv1</b>  | 2.594527936 | 2.09E-12   | 7.31E-11   |
| <b>S1pr3</b>   | 2.59377194  | 1.06E-09   | 2.53E-08   |
| <b>Sybu</b>    | 2.589083503 | 3.43E-05   | 0.0003462  |
| <b>Amot</b>    | 2.583695843 | 2.60E-18   | 1.75E-16   |
| <b>Cdkn2b</b>  | 2.555065459 | 0.00064067 | 0.00453819 |
| <b>Zfp37</b>   | 2.537395818 | 4.04E-05   | 0.00040107 |
| <b>Grk3</b>    | 2.524256683 | 6.93E-15   | 3.13E-13   |
| <b>Cidec</b>   | 2.514018281 | 1.58E-16   | 8.58E-15   |
| <b>Csf2rb2</b> | 2.499307372 | 7.50E-08   | 1.32E-06   |
| <b>Rgs2</b>    | 2.492034968 | 1.39E-06   | 1.91E-05   |
| <b>Lgals3</b>  | 2.491956101 | 6.04E-07   | 8.88E-06   |
| <b>Dbp</b>     | 2.489564018 | 9.64E-16   | 4.73E-14   |
| <b>Pnpla3</b>  | 2.477318288 | 4.72E-06   | 5.80E-05   |
| <b>Klf10</b>   | 2.472125509 | 1.97E-24   | 2.16E-22   |
| <b>Hid1</b>    | 2.471388538 | 3.95E-09   | 8.48E-08   |
| <b>Prom1</b>   | 2.460917493 | 5.14E-09   | 1.08E-07   |
| <b>Psrc1</b>   | 2.456288419 | 0.00047032 | 0.00350232 |
| <b>Ccl2</b>    | 2.439390774 | 0.00028694 | 0.00228786 |
| <b>Cxcl1</b>   | 2.438947197 | 1.83E-20   | 1.43E-18   |
| <b>Nucb2</b>   | 2.438211173 | 1.25E-11   | 3.97E-10   |
| <b>Clmp</b>    | 2.433136874 | 2.08E-05   | 0.00022152 |
| <b>Itpril2</b> | 2.419625796 | 7.15E-16   | 3.58E-14   |
| <b>P2rx7</b>   | 2.419230887 | 5.19E-10   | 1.31E-08   |
| <b>Cgref1</b>  | 2.419118996 | 2.76E-06   | 3.56E-05   |
| <b>Itga6</b>   | 2.416334638 | 3.09E-18   | 2.04E-16   |
| <b>Haus8</b>   | 2.410787192 | 1.66E-09   | 3.80E-08   |
| <b>Vcam1</b>   | 2.39863435  | 6.21E-25   | 7.00E-23   |
| <b>Scube1</b>  | 2.391077176 | 8.31E-05   | 0.00076263 |
| <b>Mfge8</b>   | 2.389849401 | 1.17E-21   | 1.01E-19   |
| <b>Apoc2</b>   | 2.383076442 | 4.14E-55   | 2.09E-52   |
| <b>Gm5148</b>  | 2.382471451 | 0.0001877  | 0.00156938 |
| <b>Ppl</b>     | 2.375343956 | 1.31E-17   | 8.08E-16   |
| <b>Aqp7</b>    | 2.373914919 | 0.00011082 | 0.0009882  |
| <b>Cyp4f16</b> | 2.370935681 | 4.13E-07   | 6.26E-06   |

---



---

|                      |             |            |            |
|----------------------|-------------|------------|------------|
| <b>Tyrobp</b>        | 2.370759052 | 1.26E-07   | 2.12E-06   |
| <b>Aldh112</b>       | 2.361810969 | 0.00016621 | 0.00141031 |
| <b>H2-Eb1</b>        | 2.361531506 | 5.89E-18   | 3.75E-16   |
| <b>Clip2</b>         | 2.359651495 | 2.42E-08   | 4.66E-07   |
| <b>Ear2</b>          | 2.357276425 | 1.51E-05   | 0.00016563 |
| <b>Trpm4</b>         | 2.355584839 | 5.90E-06   | 7.12E-05   |
| <b>Aldh18a1</b>      | 2.349727646 | 2.01E-05   | 0.00021461 |
| <b>Gpc6</b>          | 2.346035965 | 1.09E-14   | 4.82E-13   |
| <b>Thsd4</b>         | 2.345489729 | 8.73E-11   | 2.46E-09   |
| <b>Cyp39a1</b>       | 2.341430756 | 1.45E-20   | 1.14E-18   |
| <b>Blnk</b>          | 2.334954752 | 4.19E-06   | 5.20E-05   |
| <b>Tmc5</b>          | 2.332712092 | 2.29E-05   | 0.0002415  |
| <b>Per3</b>          | 2.330803004 | 6.76E-24   | 6.99E-22   |
| <b>Osbp110</b>       | 2.325039526 | 0.00092513 | 0.00624838 |
| <b>Cdkn1a</b>        | 2.324510383 | 5.52E-05   | 0.0005313  |
| <b>Fndc3b</b>        | 2.32427769  | 4.32E-46   | 1.37E-43   |
| <b>Nipal1</b>        | 2.323776019 | 0.00024901 | 0.0020204  |
| <b>Col1a2</b>        | 2.309602544 | 1.46E-22   | 1.35E-20   |
| <b>A2ml1</b>         | 2.307187715 | 1.64E-09   | 3.76E-08   |
| <b>Ly9</b>           | 2.302123004 | 6.50E-05   | 0.00061257 |
| <b>Plxna3</b>        | 2.291804826 | 2.31E-06   | 3.06E-05   |
| <b>Ctss</b>          | 2.289402355 | 8.95E-16   | 4.43E-14   |
| <b>Sytl5</b>         | 2.288926722 | 5.38E-05   | 0.00051852 |
| <b>Ttc39a</b>        | 2.280256824 | 3.17E-07   | 4.89E-06   |
| <b>Mmp27</b>         | 2.277287756 | 9.04E-05   | 0.00082371 |
| <b>Synj2</b>         | 2.271732654 | 1.78E-23   | 1.77E-21   |
| <b>4930533B01Rik</b> | 2.266982713 | 0.00023034 | 0.00188403 |
| <b>Trib3</b>         | 2.264031273 | 3.72E-08   | 6.88E-07   |
| <b>Pold4</b>         | 2.263891255 | 6.43E-08   | 1.15E-06   |
| <b>Zfp9</b>          | 2.261444305 | 4.54E-07   | 6.79E-06   |
| <b>Dhrs9</b>         | 2.247962773 | 8.38E-06   | 9.72E-05   |
| <b>Cyb561</b>        | 2.241014518 | 4.60E-08   | 8.34E-07   |
| <b>Lratd2</b>        | 2.214377289 | 2.84E-08   | 5.40E-07   |
| <b>Slc9a7</b>        | 2.214083291 | 6.54E-05   | 0.00061624 |
| <b>Myof</b>          | 2.213632764 | 9.42E-13   | 3.38E-11   |
| <b>Mki67</b>         | 2.210226447 | 1.55E-08   | 3.07E-07   |

---

---

|                  |             |            |            |
|------------------|-------------|------------|------------|
| <b>Fabp5</b>     | 2.195864893 | 6.44E-07   | 9.40E-06   |
| <b>Aig1</b>      | 2.177834152 | 1.12E-17   | 6.90E-16   |
| <b>Ptafr</b>     | 2.164696117 | 0.00015537 | 0.00132535 |
| <b>Cd300lb</b>   | 2.161787797 | 0.00045363 | 0.00339839 |
| <b>Cdh1</b>      | 2.158855866 | 3.03E-10   | 7.95E-09   |
| <b>Tmem71</b>    | 2.158021359 | 6.29E-05   | 0.0005951  |
| <b>Pck2</b>      | 2.154974385 | 4.65E-05   | 0.00045334 |
| <b>Ms4a7</b>     | 2.148683775 | 0.00094351 | 0.00634597 |
| <b>Pls1</b>      | 2.144821815 | 0.00119133 | 0.0077228  |
| <b>Lgmn</b>      | 2.139916522 | 2.52E-28   | 3.68E-26   |
| <b>Clca3a1</b>   | 2.129845364 | 5.68E-16   | 2.89E-14   |
| <b>Rgs1</b>      | 2.127915165 | 4.30E-05   | 0.00042282 |
| <b>Uap1l1</b>    | 2.126011657 | 1.22E-09   | 2.88E-08   |
| <b>Hist1h2bq</b> | 2.122830485 | 0.00106766 | 0.00705443 |
| <b>Ifngr1</b>    | 2.122695129 | 8.25E-33   | 1.53E-30   |
| <b>Plaur</b>     | 2.120818652 | 7.77E-05   | 0.00071885 |
| <b>Tenn4</b>     | 2.120215357 | 0.00031226 | 0.00245694 |
| <b>Cd44</b>      | 2.118857539 | 6.70E-14   | 2.73E-12   |
| <b>Chka</b>      | 2.112119284 | 2.64E-64   | 1.94E-61   |
| <b>Ccnd1</b>     | 2.105009198 | 5.18E-13   | 1.91E-11   |
| <b>Nxn</b>       | 2.098769673 | 1.85E-05   | 0.00019942 |
| <b>Adamts14</b>  | 2.096663088 | 6.38E-08   | 1.14E-06   |
| <b>Plau</b>      | 2.096088307 | 1.50E-05   | 0.00016505 |
| <b>Rhoc</b>      | 2.087570833 | 2.76E-06   | 3.56E-05   |
| <b>Tmsb10</b>    | 2.084767353 | 0.00055356 | 0.00402002 |
| <b>Pak1</b>      | 2.084046828 | 8.28E-06   | 9.65E-05   |
| <b>Clcf1</b>     | 2.082831361 | 3.31E-05   | 0.00033561 |
| <b>Alox5</b>     | 2.080139032 | 3.04E-05   | 0.00031091 |
| <b>Tnfrsf11a</b> | 2.079841506 | 0.00053894 | 0.00393339 |
| <b>Airn</b>      | 2.07778919  | 1.41E-10   | 3.88E-09   |
| <b>Tnc</b>       | 2.076463773 | 4.73E-09   | 1.00E-07   |
| <b>S100a11</b>   | 2.074586646 | 0.00155018 | 0.00967253 |
| <b>Itga4</b>     | 2.0697042   | 6.05E-14   | 2.49E-12   |
| <b>Top2a</b>     | 2.06920185  | 1.34E-06   | 1.85E-05   |
| <b>Plat</b>      | 2.067626229 | 0.00019791 | 0.00164471 |
| <b>Mt1</b>       | 2.065345283 | 3.83E-06   | 4.82E-05   |

---

---

|                  |             |            |            |
|------------------|-------------|------------|------------|
| <b>Sorl1</b>     | 2.06425559  | 3.01E-09   | 6.66E-08   |
| <b>Cidea</b>     | 2.062952498 | 1.12E-07   | 1.89E-06   |
| <b>Cav2</b>      | 2.059943922 | 8.12E-06   | 9.50E-05   |
| <b>Rab3d</b>     | 2.059359288 | 5.98E-10   | 1.49E-08   |
| <b>Racgap1</b>   | 2.058647513 | 0.00126727 | 0.00814629 |
| <b>Sorbs2os</b>  | 2.057231232 | 2.20E-08   | 4.26E-07   |
| <b>Slfn2</b>     | 2.051856371 | 0.00028136 | 0.0022489  |
| <b>Armcx4</b>    | 2.049880067 | 2.73E-07   | 4.29E-06   |
| <b>Igdcc4</b>    | 2.04744231  | 4.06E-05   | 0.00040259 |
| <b>Prrg4</b>     | 2.044328275 | 0.00022361 | 0.00183552 |
| <b>Hmmr</b>      | 2.040418241 | 0.00077111 | 0.00534244 |
| <b>Sh3pxd2b</b>  | 2.039313322 | 2.28E-08   | 4.42E-07   |
| <b>Themis</b>    | 2.036090623 | 3.09E-07   | 4.80E-06   |
| <b>Gprc5b</b>    | 2.035933862 | 2.39E-05   | 0.00025107 |
| <b>Apcs</b>      | 2.034057776 | 2.26E-15   | 1.07E-13   |
| <b>Armcx3</b>    | 2.033675608 | 1.48E-07   | 2.45E-06   |
| <b>Mycn</b>      | 2.032896971 | 0.00014263 | 0.0012316  |
| <b>Arhgef2</b>   | 2.032158894 | 1.48E-15   | 7.09E-14   |
| <b>Ifi44</b>     | 2.028151729 | 2.98E-05   | 0.00030644 |
| <b>Tbc1d31</b>   | 2.026138649 | 8.34E-21   | 6.72E-19   |
| <b>Cybb</b>      | 2.021824646 | 5.91E-12   | 1.95E-10   |
| <b>01-Mar</b>    | 2.017332258 | 2.90E-05   | 0.0002996  |
| <b>Gm3362</b>    | 2.016537573 | 0.00041079 | 0.00311951 |
| <b>Eda2r</b>     | 2.013191446 | 0.00030824 | 0.00243034 |
| <b>Sectm1a</b>   | 2.011485935 | 0.00149449 | 0.00937516 |
| <b>Alcam</b>     | 2.008441098 | 4.70E-49   | 1.76E-46   |
| <b>Cd300a</b>    | 2.003783179 | 1.01E-06   | 1.43E-05   |
| <b>Hist1h2ao</b> | 2.002258246 | 0.00133926 | 0.0085211  |
| <b>Zfp641</b>    | 1.999180812 | 0.00022993 | 0.00188171 |
| <b>H2-Aa</b>     | 1.996746996 | 1.32E-19   | 9.74E-18   |
| <b>Slc20a1</b>   | 1.993564182 | 1.29E-22   | 1.20E-20   |
| <b>H2-Ab1</b>    | 1.990283577 | 4.48E-11   | 1.32E-09   |
| <b>Unc5b</b>     | 1.981868871 | 7.13E-11   | 2.04E-09   |
| <b>Itgb2</b>     | 1.981533095 | 3.09E-09   | 6.82E-08   |
| <b>Tc2n</b>      | 1.9793893   | 2.93E-09   | 6.48E-08   |
| <b>Zfp462</b>    | 1.976662646 | 5.57E-08   | 1.00E-06   |

---

---

|                 |             |            |            |
|-----------------|-------------|------------|------------|
| <b>Fkbp11</b>   | 1.96774403  | 2.73E-08   | 5.20E-07   |
| <b>Laptm5</b>   | 1.966820582 | 8.67E-11   | 2.45E-09   |
| <b>Hspa1b</b>   | 1.9661202   | 2.18E-05   | 0.00023133 |
| <b>Sirpa</b>    | 1.963354166 | 4.93E-13   | 1.83E-11   |
| <b>Atf3</b>     | 1.95865219  | 0.00042894 | 0.00323451 |
| <b>Adam8</b>    | 1.956669092 | 0.00035234 | 0.00273392 |
| <b>Capg</b>     | 1.949540172 | 0.00049362 | 0.00365158 |
| <b>Steap4</b>   | 1.94522797  | 9.49E-51   | 3.92E-48   |
| <b>Cpe</b>      | 1.94223659  | 0.00050507 | 0.00372156 |
| <b>Ms4a6c</b>   | 1.942105434 | 3.04E-05   | 0.00031135 |
| <b>App</b>      | 1.94074764  | 2.54E-51   | 1.11E-48   |
| <b>Tent5a</b>   | 1.940277244 | 2.69E-09   | 5.98E-08   |
| <b>Myo1f</b>    | 1.939988834 | 2.05E-07   | 3.30E-06   |
| <b>Bcl2l11</b>  | 1.937941196 | 9.21E-11   | 2.59E-09   |
| <b>Slamf8</b>   | 1.935729312 | 0.00040128 | 0.00306029 |
| <b>Slc16a6</b>  | 1.930288195 | 6.42E-11   | 1.84E-09   |
| <b>Kdelr3</b>   | 1.927223109 | 0.00019632 | 0.00163319 |
| <b>Cd74</b>     | 1.926352295 | 5.83E-17   | 3.31E-15   |
| <b>Slc7a7</b>   | 1.925715603 | 1.08E-07   | 1.83E-06   |
| <b>Gas2l3</b>   | 1.918747359 | 2.86E-06   | 3.67E-05   |
| <b>Osmr</b>     | 1.918352355 | 8.07E-13   | 2.94E-11   |
| <b>St6gal1</b>  | 1.917615058 | 4.04E-31   | 6.92E-29   |
| <b>Hk2</b>      | 1.916973912 | 4.42E-05   | 0.00043328 |
| <b>Trim68</b>   | 1.916315378 | 0.00056074 | 0.00406122 |
| <b>Col3a1</b>   | 1.916063709 | 1.46E-18   | 1.01E-16   |
| <b>Rnu1b6</b>   | 1.91557664  | 0.00020205 | 0.00167562 |
| <b>Cxcl10</b>   | 1.91463833  | 0.0007257  | 0.00506704 |
| <b>Cln6</b>     | 1.912779879 | 2.28E-05   | 0.00024038 |
| <b>Lepr</b>     | 1.909726431 | 1.36E-08   | 2.73E-07   |
| <b>Arhgap22</b> | 1.906662644 | 0.00106335 | 0.00702881 |
| <b>Vill</b>     | 1.903307713 | 0.00134348 | 0.00854252 |
| <b>Pdlim7</b>   | 1.900953814 | 3.88E-06   | 4.87E-05   |
| <b>Ncapg2</b>   | 1.900608338 | 5.76E-05   | 0.00055066 |
| <b>Abcc12</b>   | 1.892579273 | 0.00109838 | 0.00721554 |
| <b>Emp1</b>     | 1.89093594  | 0.00024446 | 0.00198847 |
| <b>Glis3</b>    | 1.888757469 | 2.34E-06   | 3.09E-05   |

---

|                      |             |            |            |
|----------------------|-------------|------------|------------|
| <b>C3ar1</b>         | 1.877795408 | 1.39E-05   | 0.00015347 |
| <b>F630028O10Rik</b> | 1.874170067 | 5.12E-06   | 6.25E-05   |
| <b>Cenpe</b>         | 1.873568767 | 9.85E-05   | 0.00089195 |
| <b>Gpc1</b>          | 1.86257432  | 8.71E-16   | 4.32E-14   |
| <b>Slc35f2</b>       | 1.856740844 | 0.00087031 | 0.00592028 |
| <b>Tceal8</b>        | 1.849975181 | 5.62E-05   | 0.00053919 |
| <b>Rbp1</b>          | 1.846889149 | 2.08E-05   | 0.00022188 |
| <b>Ccnb2</b>         | 1.846860474 | 0.00081271 | 0.00559698 |
| <b>Iqgap1</b>        | 1.845246997 | 1.49E-18   | 1.02E-16   |
| <b>Igfbp3</b>        | 1.839313448 | 3.48E-16   | 1.79E-14   |
| <b>Myo7b</b>         | 1.839026312 | 0.00042104 | 0.00318238 |
| <b>Slc7a1</b>        | 1.826578349 | 0.00030299 | 0.00239568 |
| <b>Soat1</b>         | 1.825959002 | 8.31E-09   | 1.71E-07   |
| <b>Cd24a</b>         | 1.823651336 | 0.00040953 | 0.00311289 |
| <b>A930019D19Rik</b> | 1.809683376 | 3.10E-05   | 0.00031624 |
| <b>Ckap4</b>         | 1.807038091 | 9.97E-06   | 0.00011415 |
| <b>Caprin2</b>       | 1.80527918  | 5.95E-05   | 0.00056637 |
| <b>Tpm1</b>          | 1.80377147  | 6.91E-23   | 6.56E-21   |
| <b>2010003K11Rik</b> | 1.799639339 | 1.81E-06   | 2.44E-05   |
| <b>Unc119</b>        | 1.792666338 | 1.84E-05   | 0.0001986  |
| <b>Ubd</b>           | 1.791322124 | 0.00135414 | 0.00859166 |
| <b>Spaca6</b>        | 1.791203593 | 1.27E-13   | 4.96E-12   |
| <b>Bco1</b>          | 1.788219605 | 2.99E-06   | 3.83E-05   |
| <b>Anln</b>          | 1.788039817 | 0.00100133 | 0.00669575 |
| <b>Klf6</b>          | 1.78493858  | 5.72E-10   | 1.43E-08   |
| <b>Parvg</b>         | 1.782726632 | 0.00074802 | 0.00520254 |
| <b>Pcdh17</b>        | 1.779197215 | 3.24E-07   | 4.99E-06   |
| <b>Clec4a2</b>       | 1.779103037 | 0.00083926 | 0.00575276 |
| <b>Abcg1</b>         | 1.778288222 | 5.46E-10   | 1.37E-08   |
| <b>Plagl1</b>        | 1.777932872 | 0.00160737 | 0.00995896 |
| <b>Nrg4</b>          | 1.77414325  | 1.02E-07   | 1.74E-06   |
| <b>Bcl6</b>          | 1.768638177 | 1.08E-14   | 4.81E-13   |
| <b>Klhl13</b>        | 1.768280147 | 2.22E-05   | 0.00023531 |
| <b>Ypel4</b>         | 1.763981168 | 0.00046319 | 0.00345879 |
| <b>Sla</b>           | 1.761567168 | 9.15E-06   | 0.00010562 |
| <b>Ptprc</b>         | 1.757973018 | 3.20E-14   | 1.37E-12   |

---

|                |             |            |            |
|----------------|-------------|------------|------------|
| <b>Rcan3</b>   | 1.754065037 | 0.00085398 | 0.00583135 |
| <b>Pla2g7</b>  | 1.752421985 | 9.48E-05   | 0.00086069 |
| <b>Gspt2</b>   | 1.748023439 | 0.0008026  | 0.00553679 |
| <b>Ms4a6b</b>  | 1.747797594 | 0.00034304 | 0.00267565 |
| <b>Cstb</b>    | 1.74747649  | 1.86E-05   | 0.00020055 |
| <b>Plekha1</b> | 1.744993802 | 3.06E-16   | 1.59E-14   |
| <b>Pfkfb4</b>  | 1.743930067 | 0.00044105 | 0.00331344 |
| <b>Ikbip</b>   | 1.743825262 | 1.98E-05   | 0.00021153 |
| <b>Kbtbd11</b> | 1.743478334 | 0.00063301 | 0.00449858 |
| <b>Axl</b>     | 1.740597955 | 7.51E-15   | 3.38E-13   |
| <b>Piga</b>    | 1.737901899 | 2.45E-08   | 4.72E-07   |
| <b>Cd68</b>    | 1.732690243 | 1.43E-06   | 1.97E-05   |
| <b>Sh3bp4</b>  | 1.731174665 | 0.00018199 | 0.00153132 |
| <b>Rtn4</b>    | 1.729241428 | 5.47E-22   | 4.80E-20   |
| <b>Snn</b>     | 1.719382906 | 0.00107908 | 0.0071153  |
| <b>Itgam</b>   | 1.718281949 | 0.00049928 | 0.00368564 |
| <b>Tlr9</b>    | 1.717935175 | 0.00041333 | 0.00313735 |
| <b>Psd4</b>    | 1.710828244 | 3.01E-06   | 3.85E-05   |
| <b>Ptgfrn</b>  | 1.710004553 | 4.01E-06   | 5.00E-05   |
| <b>Ica1</b>    | 1.709254199 | 3.50E-07   | 5.38E-06   |
| <b>Cd300lf</b> | 1.702908546 | 0.00010494 | 0.00094094 |
| <b>Fam217b</b> | 1.701728844 | 0.00103156 | 0.00686374 |
| <b>Enc1</b>    | 1.699820951 | 2.14E-08   | 4.16E-07   |
| <b>Zfp608</b>  | 1.699079126 | 3.70E-08   | 6.86E-07   |
| <b>Btc</b>     | 1.695263294 | 0.00053319 | 0.00390018 |
| <b>Ly6e</b>    | 1.694983905 | 4.78E-23   | 4.61E-21   |
| <b>Pdgfb</b>   | 1.694637765 | 0.00098226 | 0.0065764  |
| <b>Cd53</b>    | 1.689134827 | 4.88E-06   | 5.98E-05   |
| <b>Kif20b</b>  | 1.684215837 | 0.00076769 | 0.0053233  |
| <b>Hpgds</b>   | 1.68315584  | 0.0002706  | 0.00217259 |
| <b>Prrg1</b>   | 1.681592546 | 0.00114224 | 0.00744651 |
| <b>Fgl2</b>    | 1.681093424 | 1.77E-07   | 2.90E-06   |
| <b>Fam83g</b>  | 1.681033243 | 0.00088427 | 0.0060026  |
| <b>Fblim1</b>  | 1.680009327 | 0.00089344 | 0.00605214 |
| <b>Gbp2</b>    | 1.677439338 | 0.00011519 | 0.00101985 |
| <b>Prc1</b>    | 1.673819664 | 5.53E-05   | 0.00053172 |

---

---

|                      |             |            |            |
|----------------------|-------------|------------|------------|
| <b>Lrrtm2</b>        | 1.662415807 | 4.33E-08   | 7.93E-07   |
| <b>Srrm4</b>         | 1.66210021  | 8.84E-06   | 0.00010228 |
| <b>Tlr2</b>          | 1.659099392 | 0.00034014 | 0.00265558 |
| <b>Lyz2</b>          | 1.657093717 | 9.72E-08   | 1.67E-06   |
| <b>Prr51</b>         | 1.65565232  | 5.56E-05   | 0.0005341  |
| <b>Tmem263</b>       | 1.654117806 | 8.88E-08   | 1.54E-06   |
| <b>Igsf6</b>         | 1.651951577 | 6.44E-06   | 7.70E-05   |
| <b>Cd93</b>          | 1.645221235 | 5.21E-13   | 1.92E-11   |
| <b>Rps12</b>         | 1.644370157 | 3.67E-09   | 7.96E-08   |
| <b>Ikbke</b>         | 1.643104711 | 5.64E-24   | 5.87E-22   |
| <b>Pygb</b>          | 1.64155796  | 3.23E-08   | 6.06E-07   |
| <b>Lama5</b>         | 1.64005384  | 8.92E-13   | 3.22E-11   |
| <b>H2-Q1</b>         | 1.635572    | 9.92E-05   | 0.00089573 |
| <b>Loxl4</b>         | 1.634431649 | 4.12E-08   | 7.57E-07   |
| <b>Cyp4f18</b>       | 1.633269744 | 0.00142344 | 0.00898536 |
| <b>Prss8</b>         | 1.632802232 | 1.06E-06   | 1.49E-05   |
| <b>Coq8b</b>         | 1.632244801 | 2.05E-07   | 3.31E-06   |
| <b>Cpne8</b>         | 1.631397431 | 7.69E-05   | 0.00071263 |
| <b>Itpr3</b>         | 1.628442769 | 1.56E-06   | 2.13E-05   |
| <b>Greb1l</b>        | 1.62573449  | 9.37E-08   | 1.61E-06   |
| <b>Selenon</b>       | 1.62572821  | 0.000167   | 0.00141552 |
| <b>Aph1b</b>         | 1.625297272 | 0.0010732  | 0.0070794  |
| <b>Gm15408</b>       | 1.625278216 | 8.34E-05   | 0.00076529 |
| <b>Plin4</b>         | 1.623215765 | 1.46E-05   | 0.00016046 |
| <b>Bcl2l1</b>        | 1.623084685 | 2.23E-18   | 1.51E-16   |
| <b>Morc4</b>         | 1.621735693 | 0.00074513 | 0.0051847  |
| <b>1700017B05Rik</b> | 1.621030608 | 4.17E-11   | 1.24E-09   |
| <b>Fcgr4</b>         | 1.620143462 | 0.00025063 | 0.00203147 |
| <b>Fcgr3</b>         | 1.619740264 | 0.000108   | 0.00096627 |
| <b>Susd2</b>         | 1.616991857 | 0.00070616 | 0.00496065 |
| <b>Cd5l</b>          | 1.615699815 | 1.06E-09   | 2.54E-08   |
| <b>Uggt2</b>         | 1.614834387 | 2.99E-08   | 5.65E-07   |
| <b>Abcb1a</b>        | 1.614001203 | 2.20E-07   | 3.53E-06   |
| <b>Adgre1</b>        | 1.609933635 | 1.02E-07   | 1.75E-06   |
| <b>Oas3</b>          | 1.606732667 | 0.00077887 | 0.00538922 |
| <b>Mycl</b>          | 1.600726542 | 0.00042674 | 0.00322244 |

---

---

|                  |             |            |            |
|------------------|-------------|------------|------------|
| <b>Pgm1</b>      | 1.597383394 | 0.00023858 | 0.00194456 |
| <b>Unc13b</b>    | 1.595531146 | 3.60E-15   | 1.67E-13   |
| <b>Dcbld1</b>    | 1.594614225 | 2.69E-07   | 4.24E-06   |
| <b>Csf2rb</b>    | 1.592620938 | 2.32E-06   | 3.07E-05   |
| <b>Tspan2</b>    | 1.592297654 | 0.00124283 | 0.00802119 |
| <b>Slc22a27</b>  | 1.581920989 | 0.00103359 | 0.00687439 |
| <b>Arsg</b>      | 1.581686779 | 5.42E-14   | 2.26E-12   |
| <b>Btg3</b>      | 1.578143455 | 0.00093527 | 0.00630633 |
| <b>Myadm</b>     | 1.56999005  | 1.15E-13   | 4.57E-12   |
| <b>Mllt3</b>     | 1.568715873 | 4.21E-07   | 6.36E-06   |
| <b>H2-DMa</b>    | 1.567999905 | 0.00108182 | 0.00713046 |
| <b>Tmc3</b>      | 1.566937452 | 0.00038357 | 0.00294192 |
| <b>Vnn3</b>      | 1.562043352 | 1.03E-41   | 2.92E-39   |
| <b>Wfdc2</b>     | 1.555166069 | 0.00014617 | 0.00125749 |
| <b>Dnajc10</b>   | 1.554028189 | 3.48E-24   | 3.67E-22   |
| <b>Sorbs2</b>    | 1.553961382 | 1.78E-21   | 1.49E-19   |
| <b>Fxyd5</b>     | 1.552343058 | 0.00129353 | 0.00827877 |
| <b>Sema4d</b>    | 1.547895525 | 0.00126872 | 0.00815238 |
| <b>Ppbp</b>      | 1.547694569 | 0.00142799 | 0.00900709 |
| <b>D1Ert622e</b> | 1.546583156 | 1.14E-06   | 1.60E-05   |
| <b>St8sia4</b>   | 1.542981305 | 0.00071459 | 0.00500893 |
| <b>Rbl1</b>      | 1.542763668 | 0.00014957 | 0.00128469 |
| <b>Limch1</b>    | 1.54119807  | 0.00056272 | 0.00407187 |
| <b>Orm2</b>      | 1.540224748 | 0.00056879 | 0.00411398 |
| <b>Sel1l3</b>    | 1.538904802 | 2.03E-16   | 1.09E-14   |
| <b>Tubb6</b>     | 1.536683625 | 1.04E-05   | 0.00011789 |
| <b>Insyn2b</b>   | 1.535370596 | 0.00111504 | 0.00729571 |
| <b>Gm19705</b>   | 1.535295995 | 0.00125924 | 0.00810436 |
| <b>Rsad2</b>     | 1.53413326  | 2.60E-06   | 3.40E-05   |
| <b>Slc30a4</b>   | 1.532742517 | 2.35E-08   | 4.55E-07   |
| <b>Gramd1b</b>   | 1.528773819 | 1.06E-06   | 1.49E-05   |
| <b>Anxa9</b>     | 1.527497329 | 0.00044862 | 0.003364   |
| <b>Myo5a</b>     | 1.523390756 | 2.44E-05   | 0.00025595 |
| <b>Icam1</b>     | 1.520323402 | 7.19E-08   | 1.27E-06   |
| <b>Creb3l2</b>   | 1.520161564 | 1.98E-24   | 2.16E-22   |
| <b>Kcnj8</b>     | 1.517887363 | 0.00015092 | 0.00129493 |

---



|                      |              |            |            |
|----------------------|--------------|------------|------------|
| <b>Rhbdf1</b>        | 1.515857082  | 8.68E-08   | 1.50E-06   |
| <b>Clec12a</b>       | 1.513848857  | 0.0002673  | 0.00215361 |
| <b>Tm4sf4</b>        | 1.506569188  | 1.43E-21   | 1.22E-19   |
| <b>Gsdme</b>         | 1.505992855  | 2.51E-11   | 7.69E-10   |
| <b>Bcl2</b>          | 1.50484005   | 0.0004755  | 0.00353273 |
| <b>Zfp704</b>        | 1.503826306  | 4.87E-14   | 2.05E-12   |
| <b>Exd1</b>          | -1.502979625 | 0.00013875 | 0.00120196 |
| <b>Smad9</b>         | -1.507109526 | 1.01E-07   | 1.73E-06   |
| <b>Sugct</b>         | -1.508335982 | 3.50E-11   | 1.05E-09   |
| <b>Ces1f</b>         | -1.51419683  | 1.80E-11   | 5.63E-10   |
| <b>Alas2</b>         | -1.51908263  | 4.05E-18   | 2.64E-16   |
| <b>Pigr</b>          | -1.52199712  | 2.42E-38   | 5.57E-36   |
| <b>Dcxr</b>          | -1.522835274 | 2.76E-13   | 1.05E-11   |
| <b>C4a</b>           | -1.528144017 | 3.09E-07   | 4.80E-06   |
| <b>Serpina6</b>      | -1.531102381 | 2.14E-27   | 2.89E-25   |
| <b>Lipc</b>          | -1.531316296 | 2.48E-19   | 1.79E-17   |
| <b>D630024D03Rik</b> | -1.53163833  | 0.00052024 | 0.00381762 |
| <b>Tat</b>           | -1.532800963 | 0.00012377 | 0.00108679 |
| <b>Hhip</b>          | -1.538316922 | 0.00086958 | 0.00591783 |
| <b>Neat1</b>         | -1.540711373 | 9.51E-10   | 2.29E-08   |
| <b>Apoa2</b>         | -1.542317157 | 2.68E-31   | 4.75E-29   |
| <b>Gsta3</b>         | -1.544078905 | 3.35E-68   | 3.00E-65   |
| <b>Cyp4a12a</b>      | -1.546181399 | 4.97E-08   | 8.94E-07   |
| <b>Coq8a</b>         | -1.547653574 | 8.17E-17   | 4.56E-15   |
| <b>Gstt2</b>         | -1.550347065 | 1.42E-15   | 6.83E-14   |
| <b>D630039A03Rik</b> | -1.563232201 | 9.75E-08   | 1.67E-06   |
| <b>Snord85</b>       | -1.563574713 | 2.80E-05   | 0.00029038 |
| <b>Ndrp2</b>         | -1.564873935 | 2.50E-59   | 1.49E-56   |
| <b>Nfil3</b>         | -1.565177474 | 1.06E-11   | 3.41E-10   |
| <b>Abcb11</b>        | -1.565225463 | 5.98E-09   | 1.25E-07   |
| <b>Ugt2a3</b>        | -1.566147615 | 2.78E-22   | 2.54E-20   |
| <b>Socs2</b>         | -1.569083822 | 6.86E-05   | 0.00064365 |
| <b>Ces1d</b>         | -1.574355443 | 1.80E-16   | 9.70E-15   |
| <b>Cyp4f15</b>       | -1.576484984 | 4.36E-84   | 7.81E-81   |
| <b>Cyp3a44</b>       | -1.578510695 | 0.00022632 | 0.00185529 |
| <b>Asl</b>           | -1.582250785 | 3.38E-14   | 1.44E-12   |

---

|                      |              |            |            |
|----------------------|--------------|------------|------------|
| <b>Cyp2e1</b>        | -1.586193446 | 3.76E-22   | 3.35E-20   |
| <b>Fam184a</b>       | -1.587019022 | 0.00094129 | 0.00633367 |
| <b>Rdh19</b>         | -1.589845576 | 0.00153235 | 0.0095791  |
| <b>Mapk15</b>        | -1.591556589 | 2.60E-13   | 9.90E-12   |
| <b>Otc</b>           | -1.591768395 | 2.15E-20   | 1.67E-18   |
| <b>Ttc36</b>         | -1.599581916 | 1.42E-40   | 3.87E-38   |
| <b>Ido2</b>          | -1.600074202 | 1.63E-21   | 1.38E-19   |
| <b>Cyp2d9</b>        | -1.608897148 | 9.22E-19   | 6.46E-17   |
| <b>Serpina3k</b>     | -1.612160401 | 4.44E-29   | 6.69E-27   |
| <b>Rgn</b>           | -1.616715    | 1.22E-23   | 1.25E-21   |
| <b>Col13a1</b>       | -1.622182609 | 5.16E-06   | 6.28E-05   |
| <b>Ugt1a9</b>        | -1.622221743 | 1.49E-09   | 3.45E-08   |
| <b>Hdh3</b>          | -1.626151987 | 8.25E-06   | 9.63E-05   |
| <b>Cndp1</b>         | -1.628610561 | 0.00111306 | 0.00728574 |
| <b>Foxa2</b>         | -1.63152565  | 4.49E-08   | 8.17E-07   |
| <b>Pah</b>           | -1.643928446 | 8.77E-26   | 1.03E-23   |
| <b>Gm4952</b>        | -1.646327196 | 2.27E-24   | 2.44E-22   |
| <b>Ugt2b1</b>        | -1.66028266  | 4.53E-10   | 1.15E-08   |
| <b>Slc27a5</b>       | -1.671838992 | 1.17E-67   | 9.91E-65   |
| <b>Ggt6</b>          | -1.680851172 | 2.44E-11   | 7.50E-10   |
| <b>Arntl</b>         | -1.682758604 | 2.28E-11   | 7.05E-10   |
| <b>Ces1c</b>         | -1.687729627 | 8.71E-57   | 4.84E-54   |
| <b>Chic1</b>         | -1.691340954 | 4.17E-05   | 0.00041132 |
| <b>Nat8f5</b>        | -1.69508371  | 2.04E-08   | 3.97E-07   |
| <b>1700042O10Rik</b> | -1.698088672 | 0.00020712 | 0.00170975 |
| <b>Npr2</b>          | -1.699137343 | 2.78E-35   | 5.82E-33   |
| <b>Pecr</b>          | -1.700458548 | 1.43E-27   | 1.99E-25   |
| <b>Slc22a28</b>      | -1.705659424 | 1.12E-10   | 3.11E-09   |
| <b>Ces2c</b>         | -1.706929049 | 5.34E-07   | 7.91E-06   |
| <b>Tmem86b</b>       | -1.707782526 | 1.08E-16   | 5.96E-15   |
| <b>Onecut1</b>       | -1.714356216 | 6.69E-05   | 0.00062891 |
| <b>Gstt3</b>         | -1.716953214 | 5.24E-06   | 6.38E-05   |
| <b>Pms1</b>          | -1.718844919 | 7.91E-16   | 3.95E-14   |
| <b>Adck5</b>         | -1.744199977 | 5.00E-13   | 1.85E-11   |
| <b>Cyp2u1</b>        | -1.749578559 | 2.93E-09   | 6.48E-08   |
| <b>Lrit1</b>         | -1.752202049 | 1.12E-14   | 4.92E-13   |

---

---

|                      |              |            |            |
|----------------------|--------------|------------|------------|
| <b>Mup14</b>         | -1.75470347  | 3.21E-12   | 1.10E-10   |
| <b>Aox3</b>          | -1.757658852 | 2.53E-28   | 3.68E-26   |
| <b>Lifr</b>          | -1.758307748 | 4.75E-20   | 3.61E-18   |
| <b>Msmo1</b>         | -1.75938414  | 1.88E-16   | 1.01E-14   |
| <b>Car3</b>          | -1.759838234 | 1.54E-09   | 3.54E-08   |
| <b>Fndc1</b>         | -1.760698578 | 0.00156701 | 0.00974936 |
| <b>Arhgef37</b>      | -1.763068396 | 1.32E-06   | 1.83E-05   |
| <b>Moxd1</b>         | -1.765054477 | 2.10E-07   | 3.39E-06   |
| <b>Agxt</b>          | -1.765523732 | 6.79E-42   | 1.95E-39   |
| <b>Ahcy</b>          | -1.772680596 | 1.83E-49   | 7.01E-47   |
| <b>Cyp2d11</b>       | -1.773822367 | 1.82E-07   | 2.96E-06   |
| <b>Mbl2</b>          | -1.774638021 | 3.99E-53   | 1.89E-50   |
| <b>Mreg</b>          | -1.776505296 | 8.62E-14   | 3.48E-12   |
| <b>Mir1948</b>       | -1.781519598 | 1.11E-07   | 1.88E-06   |
| <b>Car5a</b>         | -1.791766511 | 2.13E-11   | 6.60E-10   |
| <b>E2f8</b>          | -1.798855634 | 3.92E-05   | 0.00039058 |
| <b>Ncam2</b>         | -1.799544796 | 3.57E-07   | 5.48E-06   |
| <b>Gm4737</b>        | -1.804080553 | 6.20E-23   | 5.91E-21   |
| <b>Mup10</b>         | -1.809250142 | 3.16E-08   | 5.94E-07   |
| <b>Rfx4</b>          | -1.810840469 | 8.17E-06   | 9.56E-05   |
| <b>Slco1a1</b>       | -1.819725786 | 3.25E-14   | 1.38E-12   |
| <b>LOC100862446</b>  | -1.835449664 | 1.85E-08   | 3.62E-07   |
| <b>Nlrp5-ps</b>      | -1.84156466  | 1.25E-07   | 2.09E-06   |
| <b>Clec2d</b>        | -1.846750365 | 2.01E-112  | 6.47E-109  |
| <b>Ddc</b>           | -1.855231663 | 3.66E-23   | 3.60E-21   |
| <b>Apol7a</b>        | -1.858381076 | 1.30E-35   | 2.75E-33   |
| <b>Igfbp2</b>        | -1.859075878 | 1.22E-56   | 6.56E-54   |
| <b>Serpina9</b>      | -1.862064605 | 0.00046666 | 0.00347826 |
| <b>Mup17</b>         | -1.88252774  | 4.05E-06   | 5.06E-05   |
| <b>Tmem254c</b>      | -1.883308331 | 0.00019475 | 0.00162179 |
| <b>Pdlim3</b>        | -1.884197857 | 0.00071458 | 0.00500893 |
| <b>4933404O12Rik</b> | -1.892015916 | 9.21E-05   | 0.00083776 |
| <b>Cish</b>          | -1.893373631 | 6.60E-06   | 7.86E-05   |
| <b>Abat</b>          | -1.895948169 | 5.93E-73   | 5.97E-70   |
| <b>Sntg2</b>         | -1.907906926 | 3.89E-09   | 8.38E-08   |
| <b>Aldh111</b>       | -1.908090079 | 2.09E-80   | 3.38E-77   |

---

---

|                 |              |           |            |
|-----------------|--------------|-----------|------------|
| <b>Pon1</b>     | -1.91215168  | 8.15E-31  | 1.34E-28   |
| <b>Cadm4</b>    | -1.91506585  | 6.27E-06  | 7.52E-05   |
| <b>Myh11</b>    | -1.915317708 | 2.11E-13  | 8.12E-12   |
| <b>Colgalt2</b> | -1.916583885 | 1.03E-05  | 0.00011757 |
| <b>Idi1</b>     | -1.924369302 | 4.81E-35  | 9.95E-33   |
| <b>Mup-ps16</b> | -1.927909228 | 6.17E-14  | 2.53E-12   |
| <b>Mup21</b>    | -1.929111863 | 1.25E-10  | 3.47E-09   |
| <b>Ugt3a1</b>   | -1.931688984 | 1.22E-15  | 5.93E-14   |
| <b>Bhmt</b>     | -1.933259348 | 1.46E-15  | 7.05E-14   |
| <b>Hal</b>      | -1.936231756 | 1.41E-17  | 8.64E-16   |
| <b>Scnn1a</b>   | -1.938360443 | 4.34E-15  | 2.01E-13   |
| <b>Car14</b>    | -1.94458693  | 1.46E-09  | 3.38E-08   |
| <b>Fcna</b>     | -1.947313976 | 1.85E-10  | 5.02E-09   |
| <b>Sucnr1</b>   | -1.948433609 | 1.21E-07  | 2.03E-06   |
| <b>Mup2</b>     | -1.952015051 | 9.40E-07  | 1.34E-05   |
| <b>Enho</b>     | -1.954756807 | 4.16E-05  | 0.00041083 |
| <b>Cd163</b>    | -1.960535562 | 4.65E-12  | 1.56E-10   |
| <b>Cyp4f14</b>  | -1.962532691 | 4.74E-51  | 2.01E-48   |
| <b>Tlcd2</b>    | -1.975081888 | 9.82E-15  | 4.38E-13   |
| <b>Cyp27a1</b>  | -1.977431609 | 2.29E-139 | 9.24E-136  |
| <b>Prlr</b>     | -1.981679913 | 1.69E-26  | 2.12E-24   |
| <b>Rapgef4</b>  | -1.986678339 | 3.40E-16  | 1.76E-14   |
| <b>Ugt2b38</b>  | -1.993492259 | 3.53E-09  | 7.71E-08   |
| <b>Ttc39c</b>   | -2.001429242 | 1.49E-34  | 3.05E-32   |
| <b>Ces1b</b>    | -2.002041376 | 2.46E-48  | 8.80E-46   |
| <b>S1pr5</b>    | -2.01101317  | 4.15E-07  | 6.28E-06   |
| <b>Avpr1a</b>   | -2.01497132  | 3.82E-12  | 1.29E-10   |
| <b>Cyp4a32</b>  | -2.017018761 | 1.03E-29  | 1.59E-27   |
| <b>Efna3</b>    | -2.018347431 | 2.86E-06  | 3.67E-05   |
| <b>Sult2a8</b>  | -2.020260142 | 8.29E-26  | 9.83E-24   |
| <b>Cyp2f2</b>   | -2.026309993 | 2.25E-30  | 3.66E-28   |
| <b>Grm8</b>     | -2.028301651 | 4.86E-08  | 8.80E-07   |
| <b>C7</b>       | -2.03199112  | 9.19E-08  | 1.58E-06   |
| <b>Mup3</b>     | -2.037221714 | 2.00E-15  | 9.51E-14   |
| <b>Nudt7</b>    | -2.039082426 | 3.06E-20  | 2.33E-18   |
| <b>Cyp4a12b</b> | -2.052612065 | 1.06E-14  | 4.71E-13   |

---

---

|                      |              |          |            |
|----------------------|--------------|----------|------------|
| <b>9030616G12Rik</b> | -2.05545123  | 3.55E-08 | 6.61E-07   |
| <b>Dpy19l3</b>       | -2.058135066 | 4.98E-22 | 4.39E-20   |
| <b>Akr1d1</b>        | -2.062593688 | 8.36E-24 | 8.59E-22   |
| <b>Akr1c19</b>       | -2.07458014  | 5.92E-33 | 1.11E-30   |
| <b>Mup15</b>         | -2.079098112 | 6.95E-09 | 1.44E-07   |
| <b>Hpd</b>           | -2.098851421 | 1.55E-34 | 3.12E-32   |
| <b>Cyp2c69</b>       | -2.106945127 | 4.58E-06 | 5.64E-05   |
| <b>Cyp2d12</b>       | -2.134247265 | 2.85E-06 | 3.67E-05   |
| <b>Noct</b>          | -2.146729759 | 1.17E-12 | 4.16E-11   |
| <b>Lhpp</b>          | -2.152403695 | 1.75E-21 | 1.48E-19   |
| <b>Ces1g</b>         | -2.154538841 | 5.03E-57 | 2.90E-54   |
| <b>Gm4956</b>        | -2.179663126 | 4.21E-10 | 1.08E-08   |
| <b>Nat8</b>          | -2.18027007  | 4.94E-15 | 2.27E-13   |
| <b>Neb</b>           | -2.186176544 | 4.87E-55 | 2.38E-52   |
| <b>Cyp3a11</b>       | -2.188226919 | 2.33E-21 | 1.94E-19   |
| <b>Cyp3a41b</b>      | -2.194942353 | 1.97E-06 | 2.64E-05   |
| <b>Dct</b>           | -2.246517437 | 6.54E-06 | 7.80E-05   |
| <b>Mup4</b>          | -2.270854112 | 1.17E-09 | 2.77E-08   |
| <b>Ces1e</b>         | -2.274250353 | 2.80E-48 | 9.82E-46   |
| <b>Ankrd33b</b>      | -2.292472713 | 1.48E-27 | 2.02E-25   |
| <b>Adh6-ps1</b>      | -2.29252163  | 5.42E-24 | 5.67E-22   |
| <b>Pkhd11l</b>       | -2.292716253 | 5.89E-05 | 0.00056117 |
| <b>Trhde</b>         | -2.298973524 | 6.64E-08 | 1.18E-06   |
| <b>Cyp26a1</b>       | -2.301549881 | 9.55E-11 | 2.67E-09   |
| <b>Mup5</b>          | -2.304445213 | 1.05E-13 | 4.18E-12   |
| <b>Gsta2</b>         | -2.326608176 | 1.69E-13 | 6.56E-12   |
| <b>Cyp2c23</b>       | -2.351717544 | 8.71E-80 | 1.28E-76   |
| <b>Mup6</b>          | -2.358659167 | 1.15E-16 | 6.31E-15   |
| <b>Nnmt</b>          | -2.359630547 | 7.51E-21 | 6.08E-19   |
| <b>Selenbp2</b>      | -2.364164725 | 1.25E-08 | 2.52E-07   |
| <b>Slco1a4</b>       | -2.368765469 | 9.21E-30 | 1.44E-27   |
| <b>Ass1</b>          | -2.390416304 | 2.51E-20 | 1.93E-18   |
| <b>Cth</b>           | -2.397802726 | 2.96E-21 | 2.45E-19   |
| <b>Serpine2</b>      | -2.410776075 | 8.64E-16 | 4.30E-14   |
| <b>Cyp7b1</b>        | -2.453120558 | 2.81E-19 | 2.02E-17   |
| <b>Cyp2a5</b>        | -2.457921434 | 5.99E-22 | 5.22E-20   |

---

---

|                  |              |          |          |
|------------------|--------------|----------|----------|
| <b>Slc13a2</b>   | -2.51691014  | 2.78E-07 | 4.36E-06 |
| <b>Tm7sf2</b>    | -2.524953308 | 3.86E-34 | 7.60E-32 |
| <b>Lrtm1</b>     | -2.52727082  | 1.33E-07 | 2.21E-06 |
| <b>Urad</b>      | -2.530069634 | 4.49E-17 | 2.61E-15 |
| <b>Serpina1e</b> | -2.571186137 | 2.46E-37 | 5.59E-35 |
| <b>Cyp1a2</b>    | -2.649073132 | 7.65E-37 | 1.67E-34 |
| <b>Ces2a</b>     | -2.650526677 | 5.00E-48 | 1.72E-45 |
| <b>Igfals</b>    | -2.658191643 | 3.82E-65 | 3.08E-62 |
| <b>Oat</b>       | -2.688720856 | 6.78E-31 | 1.13E-28 |
| <b>Snhg11</b>    | -2.707780525 | 2.74E-42 | 8.02E-40 |
| <b>Gm5424</b>    | -2.718655333 | 8.87E-32 | 1.59E-29 |
| <b>Cyp8b1</b>    | -2.737245799 | 2.38E-44 | 7.24E-42 |
| <b>Srgap3</b>    | -2.747121562 | 2.08E-12 | 7.26E-11 |
| <b>Hamp</b>      | -2.755967956 | 2.66E-46 | 8.58E-44 |
| <b>Cyp3a16</b>   | -2.769927747 | 8.41E-11 | 2.38E-09 |
| <b>Mup16</b>     | -2.799100418 | 2.03E-13 | 7.84E-12 |
| <b>Gm12718</b>   | -2.80433765  | 3.09E-11 | 9.32E-10 |
| <b>Sult5a1</b>   | -2.80718959  | 2.95E-16 | 1.54E-14 |
| <b>Mup8</b>      | -2.819923679 | 4.56E-17 | 2.63E-15 |
| <b>Mup13</b>     | -2.835894621 | 3.00E-16 | 1.56E-14 |
| <b>Cyp4a14</b>   | -2.867274916 | 2.97E-18 | 1.97E-16 |
| <b>Capn8</b>     | -2.93093182  | 2.37E-15 | 1.12E-13 |
| <b>Pitx3</b>     | -2.980496456 | 3.96E-07 | 6.02E-06 |
| <b>Gnmt</b>      | -3.020435265 | 4.48E-88 | 1.03E-84 |
| <b>Capn11</b>    | -3.046970827 | 5.36E-08 | 9.63E-07 |
| <b>Cyp2c50</b>   | -3.125256032 | 1.72E-40 | 4.63E-38 |
| <b>Hacl1</b>     | -3.197063753 | 9.71E-78 | 1.30E-74 |
| <b>Cyp2c29</b>   | -3.306978059 | 1.14E-28 | 1.69E-26 |
| <b>Slc22a7</b>   | -3.326308254 | 2.25E-38 | 5.25E-36 |
| <b>Mup1</b>      | -3.365817468 | 4.06E-17 | 2.37E-15 |
| <b>Keg1</b>      | -3.366449451 | 2.88E-31 | 5.05E-29 |
| <b>Cyp4a10</b>   | -3.385984073 | 2.85E-45 | 8.84E-43 |
| <b>Cyp2c37</b>   | -3.486340194 | 2.41E-62 | 1.56E-59 |
| <b>Ces3b</b>     | -3.593742494 | 1.47E-61 | 9.13E-59 |
| <b>Cyp2c55</b>   | -3.612160533 | 5.78E-16 | 2.93E-14 |
| <b>Mup12</b>     | -3.728477488 | 1.45E-24 | 1.60E-22 |

---

|                   |              |          |          |
|-------------------|--------------|----------|----------|
| <b>Cyp2c54</b>    | -3.892888884 | 4.83E-76 | 5.56E-73 |
| <b>Hsd3b5</b>     | -4.018599523 | 1.76E-34 | 3.50E-32 |
| <b>Susd4</b>      | -4.117351431 | 4.58E-52 | 2.05E-49 |
| <b>Clec2h</b>     | -4.248217248 | 1.15E-26 | 1.48E-24 |
| <b>Cyp2c53-ps</b> | -4.262878134 | 9.46E-14 | 3.80E-12 |
| <b>Mup7</b>       | -4.370398726 | 1.70E-52 | 7.84E-50 |
| <b>Cyp2b10</b>    | -4.399872642 | 3.19E-23 | 3.16E-21 |

Table S5. Gene expression profile of HC/DEN vs CW/DEN.

| <b>Symbol</b>  | <b>log2FoldChange</b> | <b>p-value</b> | <b>padj</b> |
|----------------|-----------------------|----------------|-------------|
| <b>Saa2</b>    | 7.432689453           | 1.23E-55       | 2.71E-52    |
| <b>Saa1</b>    | 6.924540616           | 8.61E-69       | 1.14E-64    |
| <b>Lcn2</b>    | 6.127052739           | 5.30E-37       | 4.07E-34    |
| <b>Moxd1</b>   | 5.064040715           | 6.34E-19       | 1.48E-16    |
| <b>Orm2</b>    | 4.534215431           | 3.84E-20       | 1.08E-17    |
| <b>Mt1</b>     | 4.054434467           | 3.21E-13       | 4.17E-11    |
| <b>Per3</b>    | 4.017268886           | 1.87E-63       | 1.24E-59    |
| <b>Dbp</b>     | 3.677768446           | 8.21E-29       | 4.35E-26    |
| <b>Mt2</b>     | 3.658480259           | 2.91E-09       | 1.77E-07    |
| <b>Mfsd2a</b>  | 3.347056711           | 4.82E-24       | 1.96E-21    |
| <b>Orm3</b>    | 3.157770021           | 6.24E-15       | 9.72E-13    |
| <b>Tmc5</b>    | 3.05873482            | 4.01E-07       | 1.46E-05    |
| <b>Per1</b>    | 3.050589709           | 2.82E-16       | 5.04E-14    |
| <b>Grem2</b>   | 3.036205707           | 1.27E-16       | 2.33E-14    |
| <b>Apoa4</b>   | 2.999698609           | 1.99E-57       | 6.60E-54    |
| <b>Fgl1</b>    | 2.942136775           | 3.98E-63       | 1.75E-59    |
| <b>Smpd3</b>   | 2.899977005           | 6.65E-11       | 5.83E-09    |
| <b>Rgs16</b>   | 2.884678692           | 1.71E-14       | 2.55E-12    |
| <b>Alpk1</b>   | 2.868289008           | 9.93E-13       | 1.10E-10    |
| <b>Ciart</b>   | 2.706357128           | 2.46E-07       | 9.65E-06    |
| <b>Acpp</b>    | 2.703478006           | 2.21E-10       | 1.66E-08    |
| <b>Fabp5</b>   | 2.701179097           | 1.58E-09       | 1.01E-07    |
| <b>Usp2</b>    | 2.675796349           | 3.81E-13       | 4.80E-11    |
| <b>Lpin1</b>   | 2.583084934           | 1.42E-12       | 1.54E-10    |
| <b>Dnah1</b>   | 2.582424433           | 5.44E-06       | 0.00015697  |
| <b>Il1r1</b>   | 2.573838693           | 9.53E-19       | 2.14E-16    |
| <b>Xirp1</b>   | 2.551795277           | 7.50E-08       | 3.36E-06    |
| <b>Cxcl14</b>  | 2.538433724           | 6.95E-06       | 0.00019372  |
| <b>Isyna1</b>  | 2.523856858           | 3.05E-06       | 9.22E-05    |
| <b>Slc13a5</b> | 2.514468866           | 6.93E-07       | 2.45E-05    |
| <b>Slc37a1</b> | 2.456222446           | 1.00E-08       | 5.57E-07    |

---

|                      |             |            |            |
|----------------------|-------------|------------|------------|
| <b>E030018B13Rik</b> | 2.438119503 | 2.99E-08   | 1.50E-06   |
| <b>Cpne8</b>         | 2.436546718 | 1.64E-08   | 8.64E-07   |
| <b>Mthfd11</b>       | 2.416418819 | 2.17E-05   | 0.00052431 |
| <b>Slc7a15</b>       | 2.413885237 | 1.22E-08   | 6.71E-07   |
| <b>Pnpla3</b>        | 2.379129508 | 8.21E-06   | 0.00022598 |
| <b>Mmd2</b>          | 2.378420685 | 3.36E-05   | 0.00075696 |
| <b>Chil3</b>         | 2.300166521 | 0.00026881 | 0.0042215  |
| <b>Scara5</b>        | 2.267437065 | 7.40E-11   | 6.40E-09   |
| <b>H2-B1</b>         | 2.260689448 | 0.00015828 | 0.00280519 |
| <b>C4a</b>           | 2.251152704 | 5.95E-14   | 8.57E-12   |
| <b>Adam11</b>        | 2.243305668 | 5.86E-22   | 1.94E-19   |
| <b>Per2</b>          | 2.233722943 | 6.48E-22   | 2.09E-19   |
| <b>Cyp21a1</b>       | 2.233716958 | 4.52E-05   | 0.00096805 |
| <b>Nos1ap</b>        | 2.22802671  | 7.15E-13   | 8.38E-11   |
| <b>Tff3</b>          | 2.22099297  | 4.90E-05   | 0.00103716 |
| <b>Thrsp</b>         | 2.209798539 | 1.66E-13   | 2.28E-11   |
| <b>Gm18852</b>       | 2.208302496 | 0.00026509 | 0.00417298 |
| <b>Serpina3n</b>     | 2.204558419 | 3.35E-50   | 5.54E-47   |
| <b>Hcn3</b>          | 2.179283775 | 2.45E-08   | 1.24E-06   |
| <b>Slc13a1</b>       | 2.176429169 | 0.00014075 | 0.00257593 |
| <b>Prg4</b>          | 2.17465808  | 1.70E-35   | 1.19E-32   |
| <b>Nrep</b>          | 2.165396299 | 7.37E-07   | 2.59E-05   |
| <b>Cyb561</b>        | 2.15994217  | 1.97E-07   | 7.92E-06   |
| <b>Lrg1</b>          | 2.159547936 | 2.69E-24   | 1.15E-21   |
| <b>Upp2</b>          | 2.148330216 | 1.63E-21   | 5.15E-19   |
| <b>Rad51b</b>        | 2.103701721 | 4.36E-05   | 0.00093888 |
| <b>Cd300lf</b>       | 2.101716008 | 1.58E-05   | 0.00039538 |
| <b>Socs3</b>         | 2.087851828 | 8.95E-07   | 3.03E-05   |
| <b>Mpeg1</b>         | 2.074997456 | 5.57E-26   | 2.63E-23   |
| <b>Nrg4</b>          | 2.073840387 | 1.83E-09   | 1.16E-07   |
| <b>Acot11</b>        | 2.03756466  | 6.42E-08   | 2.99E-06   |
| <b>Tef</b>           | 2.026380647 | 2.39E-34   | 1.44E-31   |
| <b>Rnu1b6</b>        | 1.96689313  | 0.00014892 | 0.00269341 |
| <b>Gm4070</b>        | 1.961258784 | 0.00018179 | 0.00312966 |
| <b>Ifi2712b</b>      | 1.947390906 | 1.65E-06   | 5.25E-05   |
| <b>Coq10b</b>        | 1.946337807 | 8.01E-14   | 1.14E-11   |
| <b>Gpcpd1</b>        | 1.936156757 | 3.18E-13   | 4.17E-11   |
| <b>Myc</b>           | 1.923953542 | 3.52E-05   | 0.00078607 |
| <b>Lepr</b>          | 1.899112608 | 3.20E-08   | 1.59E-06   |
| <b>Slc43a1</b>       | 1.885710287 | 3.64E-08   | 1.76E-06   |
| <b>Igdcc4</b>        | 1.884086883 | 8.08E-05   | 0.00158429 |
| <b>Snx10</b>         | 1.863524879 | 2.91E-13   | 3.86E-11   |

---



---

|                |             |            |            |
|----------------|-------------|------------|------------|
| <b>Esm1</b>    | 1.861249885 | 5.84E-05   | 0.00121096 |
| <b>Apcs</b>    | 1.845035836 | 8.39E-13   | 9.58E-11   |
| <b>Cyp7a1</b>  | 1.838223788 | 3.88E-12   | 3.95E-10   |
| <b>Orm1</b>    | 1.834182846 | 2.78E-19   | 6.94E-17   |
| <b>Scd1</b>    | 1.833631896 | 4.84E-10   | 3.46E-08   |
| <b>Nmrk1</b>   | 1.823478818 | 9.99E-12   | 9.59E-10   |
| <b>Esr1</b>    | 1.819019003 | 5.21E-10   | 3.71E-08   |
| <b>Alas1</b>   | 1.813102716 | 1.41E-10   | 1.13E-08   |
| <b>Rorc</b>    | 1.801553627 | 9.20E-21   | 2.71E-18   |
| <b>Clca3a1</b> | 1.784972374 | 8.58E-11   | 7.28E-09   |
| <b>Lonrf1</b>  | 1.784782104 | 3.10E-07   | 1.18E-05   |
| <b>Syne4</b>   | 1.783743558 | 0.00061267 | 0.00823471 |
| <b>Mycl</b>    | 1.77276599  | 0.00018092 | 0.0031188  |
| <b>Ly75</b>    | 1.758366541 | 3.42E-08   | 1.67E-06   |
| <b>Eif4e3</b>  | 1.75320225  | 0.00015148 | 0.00272627 |
| <b>Ccdc57</b>  | 1.747162838 | 3.31E-07   | 1.24E-05   |
| <b>Agap2</b>   | 1.741711619 | 0.00014238 | 0.00259286 |
| <b>Ptch2</b>   | 1.722739106 | 0.00040934 | 0.00589053 |
| <b>Irak3</b>   | 1.717778292 | 0.00036821 | 0.00536775 |
| <b>Slc41a3</b> | 1.69744247  | 0.00040573 | 0.00584492 |
| <b>Cobl</b>    | 1.692342619 | 1.38E-16   | 2.50E-14   |
| <b>Bhlhe40</b> | 1.675968122 | 2.50E-08   | 1.26E-06   |
| <b>Pfkfb3</b>  | 1.675493444 | 4.96E-07   | 1.79E-05   |
| <b>Tmem268</b> | 1.672850135 | 9.31E-08   | 4.10E-06   |
| <b>Cd5l</b>    | 1.657377087 | 5.59E-10   | 3.96E-08   |
| <b>Slc3a1</b>  | 1.654531285 | 8.23E-14   | 1.16E-11   |
| <b>Tmprss2</b> | 1.653879776 | 0.00016951 | 0.00296062 |
| <b>Steap4</b>  | 1.648861879 | 3.39E-35   | 2.24E-32   |
| <b>Bcl6</b>    | 1.628126488 | 7.08E-12   | 7.00E-10   |
| <b>Nampt</b>   | 1.625705654 | 6.20E-12   | 6.21E-10   |
| <b>Pklr</b>    | 1.621963368 | 5.32E-13   | 6.34E-11   |
| <b>Scd2</b>    | 1.60660189  | 6.87E-05   | 0.00138771 |
| <b>Neil2</b>   | 1.600949695 | 0.00025998 | 0.00410731 |
| <b>Gadd45g</b> | 1.568994757 | 8.19E-05   | 0.00159832 |
| <b>Adrb3</b>   | 1.566731178 | 1.09E-05   | 0.0002872  |
| <b>Plk3</b>    | 1.566141398 | 9.65E-07   | 3.25E-05   |
| <b>Tnip2</b>   | 1.555819509 | 8.42E-06   | 0.00023135 |
| <b>Slc20a1</b> | 1.553333958 | 4.18E-13   | 5.22E-11   |
| <b>Tgm1</b>    | 1.549152992 | 5.30E-06   | 0.00015408 |
| <b>Ly6e</b>    | 1.547975745 | 7.26E-19   | 1.66E-16   |
| <b>Arid5a</b>  | 1.544794405 | 0.00037221 | 0.00540914 |
| <b>Tifa</b>    | 1.543012096 | 3.73E-06   | 0.00011116 |

---

|                |              |            |            |
|----------------|--------------|------------|------------|
| <b>Zbp1</b>    | 1.536526327  | 0.00030334 | 0.00462661 |
| <b>Slc13a3</b> | 1.521135647  | 1.95E-09   | 1.22E-07   |
| <b>Map3k14</b> | 1.520830017  | 2.65E-05   | 0.00061682 |
| <b>Wfdc2</b>   | 1.500821962  | 0.00039336 | 0.00568529 |
| <b>Hpx</b>     | 1.500718692  | 6.95E-24   | 2.70E-21   |
| <b>Fstl1</b>   | -1.513227737 | 0.00024307 | 0.00389122 |
| <b>Mapk15</b>  | -1.525607498 | 1.53E-08   | 8.12E-07   |
| <b>Creg1</b>   | -1.532125346 | 6.65E-11   | 5.83E-09   |
| <b>Ypel2</b>   | -1.53419641  | 5.89E-10   | 4.15E-08   |
| <b>Hamp</b>    | -1.536004759 | 2.27E-15   | 3.71E-13   |
| <b>Eps8l2</b>  | -1.546130794 | 7.77E-17   | 1.47E-14   |
| <b>Ces2a</b>   | -1.546378092 | 2.95E-17   | 5.92E-15   |
| <b>Rab36</b>   | -1.548868826 | 2.03E-09   | 1.26E-07   |
| <b>Sdr9c7</b>  | -1.560546873 | 1.83E-10   | 1.42E-08   |
| <b>Ccn1</b>    | -1.574210546 | 5.48E-06   | 0.00015714 |
| <b>Msmo1</b>   | -1.574302097 | 7.37E-13   | 8.56E-11   |
| <b>Pctp</b>    | -1.574634152 | 1.58E-12   | 1.68E-10   |
| <b>Cyp51</b>   | -1.591094054 | 2.76E-10   | 2.04E-08   |
| <b>Timp2</b>   | -1.595984501 | 9.08E-06   | 0.00024791 |
| <b>Sdf2l1</b>  | -1.602328355 | 3.73E-09   | 2.22E-07   |
| <b>Avpr1a</b>  | -1.626141331 | 2.30E-07   | 9.12E-06   |
| <b>Mme</b>     | -1.628311606 | 5.47E-16   | 9.52E-14   |
| <b>Cyp1a2</b>  | -1.643370353 | 4.83E-15   | 7.61E-13   |
| <b>Gstm6</b>   | -1.644346074 | 1.43E-08   | 7.67E-07   |
| <b>Agxt</b>    | -1.652506625 | 2.52E-26   | 1.29E-23   |
| <b>Ces1b</b>   | -1.66152036  | 4.89E-24   | 1.96E-21   |
| <b>Tubb4b</b>  | -1.664759092 | 6.53E-13   | 7.72E-11   |
| <b>Ehhadh</b>  | -1.665416668 | 6.14E-20   | 1.63E-17   |
| <b>Aox1</b>    | -1.693466298 | 4.23E-39   | 4.31E-36   |
| <b>Cyp3a59</b> | -1.712274537 | 6.19E-16   | 1.06E-13   |
| <b>Mir122</b>  | -1.71966781  | 2.44E-05   | 0.00057684 |
| <b>Gstm4</b>   | -1.721271019 | 1.84E-10   | 1.42E-08   |
| <b>Clstn3</b>  | -1.722738129 | 1.37E-08   | 7.41E-07   |
| <b>Tubb2a</b>  | -1.723137731 | 5.49E-07   | 1.96E-05   |
| <b>Hmgcs1</b>  | -1.732604849 | 9.43E-08   | 4.12E-06   |
| <b>Cidea</b>   | -1.740641074 | 3.30E-05   | 0.00074733 |
| <b>Srgap3</b>  | -1.742345511 | 3.44E-05   | 0.0007723  |
| <b>Crot</b>    | -1.757645891 | 6.02E-38   | 5.69E-35   |
| <b>Ppp1r3c</b> | -1.769335415 | 7.01E-05   | 0.00141018 |
| <b>Abcc3</b>   | -1.777037655 | 3.25E-26   | 1.59E-23   |
| <b>Mpzl1</b>   | -1.784927411 | 0.00025959 | 0.00410603 |
| <b>Nsdhl</b>   | -1.823409421 | 3.40E-09   | 2.03E-07   |

|          |              |            |            |
|----------|--------------|------------|------------|
| Gm4952   | -1.848292484 | 1.48E-19   | 3.84E-17   |
| Vegfd    | -1.860704645 | 0.00037842 | 0.00549333 |
| Ephx1    | -1.902052013 | 6.54E-18   | 1.35E-15   |
| Gm4956   | -1.908304111 | 5.47E-06   | 0.00015713 |
| Meg3     | -1.931060453 | 0.00019575 | 0.00329677 |
| Gdf15    | -1.945039162 | 2.73E-10   | 2.03E-08   |
| G6pc2    | -1.964568499 | 0.00072446 | 0.0093806  |
| Slc13a2  | -1.976074021 | 0.00056874 | 0.00776238 |
| Gclc     | -1.999998391 | 9.30E-38   | 8.21E-35   |
| Clpx     | -2.004524322 | 1.56E-44   | 1.88E-41   |
| Mreg     | -2.022064963 | 8.49E-13   | 9.61E-11   |
| Cyp3a41b | -2.061650633 | 9.81E-05   | 0.00188682 |
| Car3     | -2.09534793  | 7.52E-13   | 8.66E-11   |
| Ces1g    | -2.118553897 | 1.46E-46   | 1.93E-43   |
| Pitx3    | -2.142440054 | 0.00078094 | 0.00999561 |
| Lrfr3    | -2.202775407 | 2.72E-07   | 1.05E-05   |
| Csad     | -2.323180715 | 5.31E-35   | 3.34E-32   |
| Pdk4     | -2.343147394 | 1.40E-08   | 7.57E-07   |
| Raet1a   | -2.345492704 | 1.22E-09   | 7.94E-08   |
| Cyp2b10  | -2.348134144 | 3.32E-07   | 1.24E-05   |
| Myh11    | -2.387773811 | 1.47E-11   | 1.38E-09   |
| Gstm1    | -2.407624804 | 1.85E-37   | 1.53E-34   |
| Gsta4    | -2.414340431 | 2.89E-12   | 3.01E-10   |
| Cyp2c55  | -2.426784697 | 1.40E-07   | 5.87E-06   |
| Clec2h   | -2.434207741 | 4.60E-13   | 5.69E-11   |
| Gstm3    | -2.445407564 | 2.48E-10   | 1.85E-08   |
| Spon2    | -2.46982861  | 2.22E-08   | 1.14E-06   |
| Cyp3a44  | -2.507616152 | 1.71E-06   | 5.42E-05   |
| Gsta2    | -2.541652769 | 2.06E-10   | 1.58E-08   |
| Hsd17b6  | -2.728590227 | 8.27E-25   | 3.65E-22   |
| Cyp3a16  | -2.822072976 | 9.71E-07   | 3.26E-05   |
| Acta2    | -2.828444234 | 1.02E-07   | 4.41E-06   |
| Cyp4a10  | -2.888166655 | 2.35E-32   | 1.30E-29   |
| Arntl    | -3.034545458 | 1.49E-15   | 2.46E-13   |
| Cyp3a11  | -3.104204805 | 3.36E-41   | 3.71E-38   |
| Idi1     | -3.634828259 | 1.31E-33   | 7.55E-31   |
| Cyp4a14  | -5.09373492  | 3.40E-51   | 6.44E-48   |

Table S6. Gene expression profile shared by W/DEN vs HC/DEN.

| Symbol | log2FoldChange HC/DEN | log2FoldChange W/DEN |
|--------|-----------------------|----------------------|
| Lcn2   | 6.127052739           | 6.144249476          |
| Apoa4  | 2.999698609           | 5.998886702          |

---

|                |              |              |
|----------------|--------------|--------------|
| <b>Ly6e</b>    | 1.547975745  | 5.92348089   |
| <b>Ifi2712</b> | 1.947390906  | 4.159263621  |
| <b>Rgs16</b>   | 2.884678692  | 4.156732381  |
| <b>Esm1</b>    | 1.861249885  | 3.603017942  |
| <b>Rad51b</b>  | 2.103701721  | 3.350889497  |
| <b>Tff3</b>    | 2.22099297   | 3.111638191  |
| <b>Saa1</b>    | 6.924540616  | 2.939575243  |
| <b>Scd</b>     | 1.60660189   | 2.898182419  |
| <b>Mpeg1</b>   | 2.074997456  | 2.880338559  |
| <b>Mthfd11</b> | 2.416418819  | 2.740371517  |
| <b>Smpd3</b>   | 2.899977005  | 2.699862618  |
| <b>Slc41a3</b> | 1.69744247   | 2.666553276  |
| <b>Saa1</b>    | 7.432689453  | 2.664266191  |
| <b>Dbp</b>     | 3.677768446  | 2.489564018  |
| <b>Pnpla3</b>  | 2.379129508  | 2.477318288  |
| <b>Tmc5</b>    | 3.05873482   | 2.332712092  |
| <b>Per3</b>    | 4.017268886  | 2.330803004  |
| <b>Cyb561</b>  | 2.15994217   | 2.241014518  |
| <b>Fabp5</b>   | 2.701179097  | 2.195864893  |
| <b>Mt1e</b>    | 4.054434467  | 2.065345283  |
| <b>Igdcc4</b>  | 1.884086883  | 2.04744231   |
| <b>Apcs</b>    | 1.845035836  | 2.034057776  |
| <b>Slc20a1</b> | 1.553333958  | 1.993564182  |
| <b>Steap4</b>  | 1.648861879  | 1.94522797   |
| <b>Lepr</b>    | 1.899112608  | 1.909726431  |
| <b>Nrg4</b>    | 2.073840387  | 1.77414325   |
| <b>Bcl6</b>    | 1.628126488  | 1.768638177  |
| <b>Cd300lf</b> | 2.101716008  | 1.702908546  |
| <b>Cpne8</b>   | 2.436546718  | 1.631397431  |
| <b>Cd5l</b>    | 1.657377087  | 1.615699815  |
| <b>Mycl</b>    | 1.77276599   | 1.600726542  |
| <b>Wfdc2</b>   | 1.500821962  | 1.555166069  |
| <b>Orm2</b>    | 4.534215431  | 1.540224748  |
| <b>Cyp3a5</b>  | -2.507616152 | -1.578510695 |
| <b>Mapk15</b>  | -1.525607498 | -1.591556589 |
| <b>Arntl</b>   | -3.034545458 | -1.682758604 |
| <b>Msmo1</b>   | -1.574302097 | -1.75938414  |
| <b>Ca3</b>     | -2.09534793  | -1.759838234 |
| <b>Moxd1</b>   | 5.064040715  | -1.765054477 |
| <b>Agxt</b>    | -1.652506625 | -1.765523732 |
| <b>Mreg</b>    | -2.022064963 | -1.776505296 |
| <b>Myh11</b>   | -2.387773811 | -1.915317708 |

---

---

|                |              |              |
|----------------|--------------|--------------|
| <b>Idi1</b>    | -3.634828259 | -1.924369302 |
| <b>Ces1</b>    | -1.66152036  | -2.002041376 |
| <b>Avpr1a</b>  | -1.626141331 | -2.01497132  |
| <b>Ces1</b>    | -2.118553897 | -2.154538841 |
| <b>Cyp3a4</b>  | -3.104204805 | -2.188226919 |
| <b>Cyp3a7</b>  | -2.061650633 | -2.194942353 |
| <b>Gsta5</b>   | -2.541652769 | -2.326608176 |
| <b>Slc13a2</b> | -1.976074021 | -2.51691014  |
| <b>Cyp1a2</b>  | -1.643370353 | -2.649073132 |
| <b>Ces2</b>    | -1.546378092 | -2.650526677 |
| <b>Srgap3</b>  | -1.742345511 | -2.747121562 |
| <b>Hamp</b>    | -1.536004759 | -2.755967956 |
| <b>Cyp3a7</b>  | -2.822072976 | -2.769927747 |
| <b>Pitx3</b>   | -2.142440054 | -2.980496456 |
| <b>Cyp4a11</b> | -2.888166655 | -3.385984073 |
| <b>Cyp2c18</b> | -2.426784697 | -3.612160533 |
| <b>Clec2d</b>  | -2.434207741 | -4.248217248 |
| <b>Cyp2b6</b>  | -2.348134144 | -4.399872642 |

---
